# Supplementary material for: Perinuclear damage from nuclear envelope deterioration elicits stress responses that contribute to LMNA cardiomyopathy
Source: PubMed Central journal article supplement — Sci Adv. 2024 May 8;10(19):eadh0798. doi: 10.1126/sciadv.adh0798 (PMC11078192; doi:10.1126/sciadv.adh0798), 2024-05-08
Supplement: sciadv.adh0798_sm.pdf [file sciadv.adh0798_sm.pdf]

Supplementary Materials for  
**Perinuclear damage from nuclear envelope deterioration elicits stress responses that contribute to *LMNA* cardiomyopathy**

Kunal Sikder *et al.*

Corresponding author: Jason C. Choi, [jason.choi2@jefferson.edu](mailto:jason.choi2@jefferson.edu)

*Sci. Adv.* **10**, eadh0798 (2024)  
DOI: 10.1126/sciadv.adh0798

**This PDF file includes:**

Figs. S1 to S14  
Tables S1 to S4

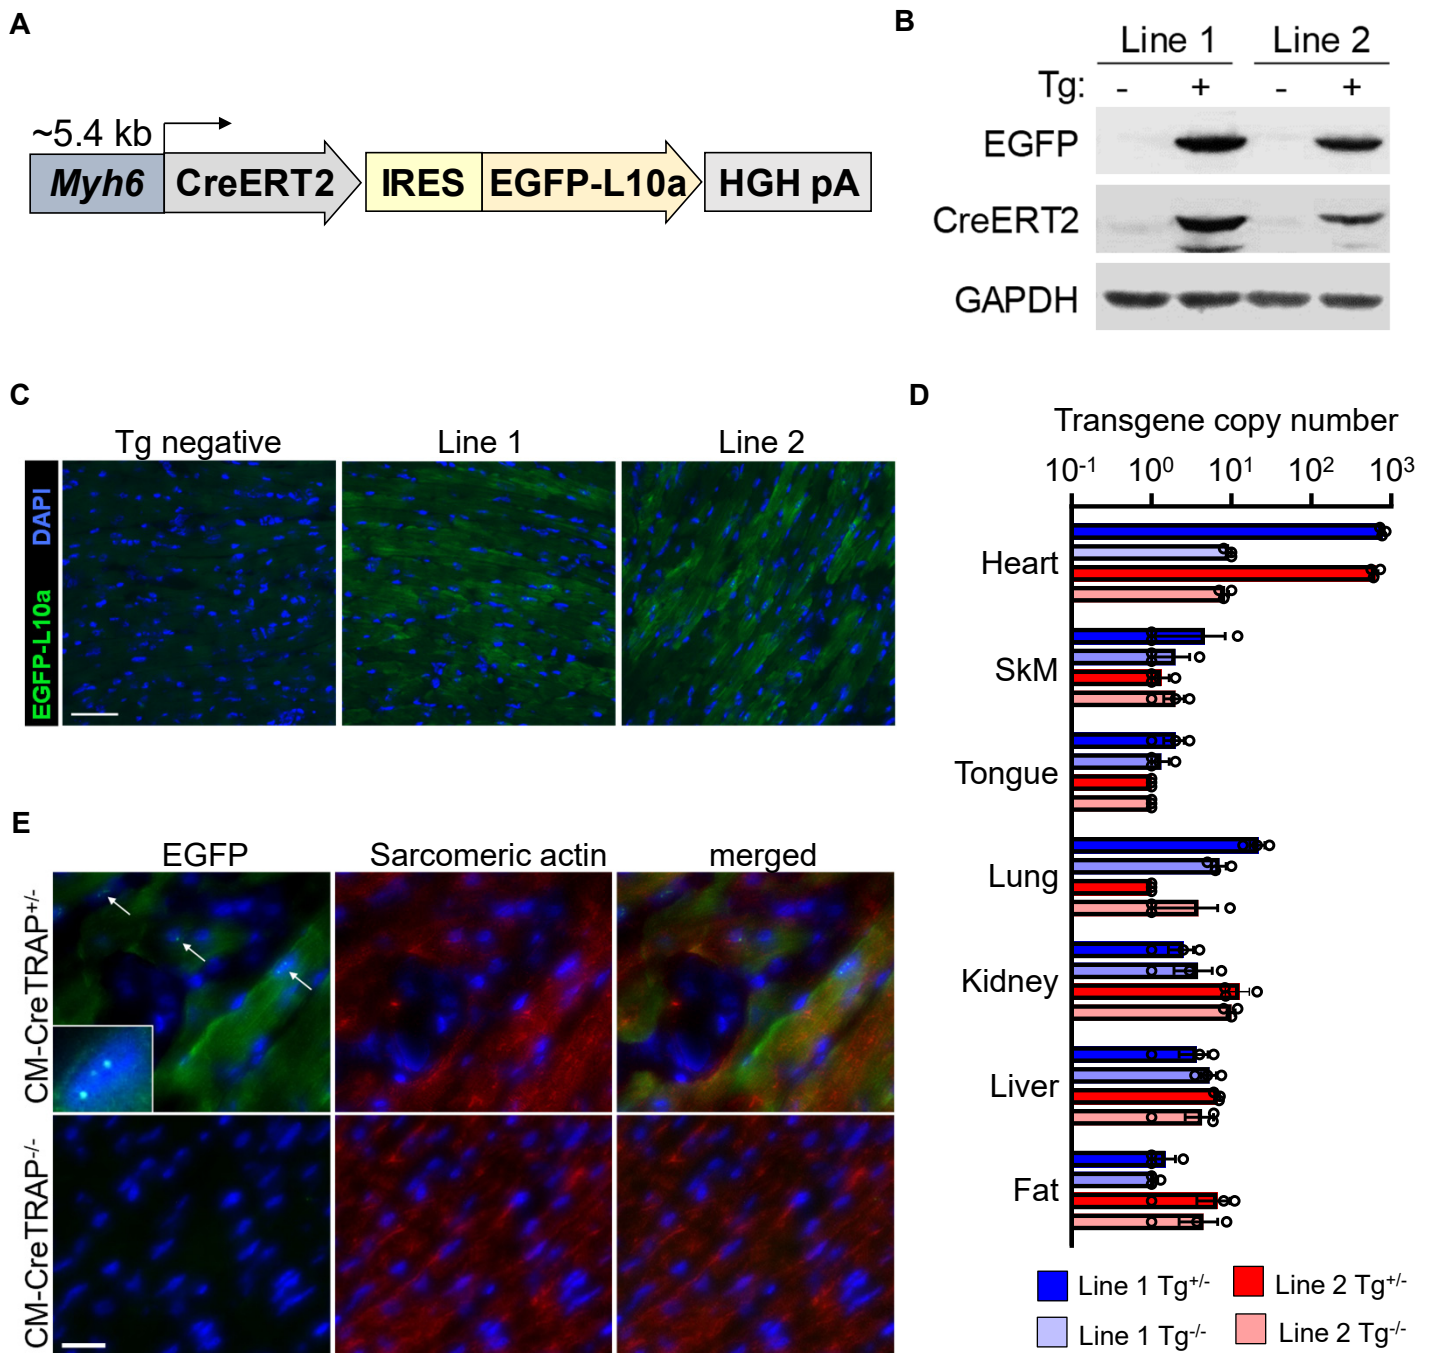

**Supplementary Fig. 1. Generation and EGFP-L10a expression in CM-CreTRAP mice.** (A) Schematic of the transgene vector. IRES and HGH pA denote internal ribosomal entry site and human growth hormone polyadenylation signal, respectively. (B) Immunoblot of GFP, CreERT2, and GAPDH on the heart extracts from 8-week-old lines 1 and 2 at F2. - and + signs denote transgenic (Tg) negative and positive, respectively. (C) Direct fluorescence micrograph images of heart sections from CM-CreTRAP transgenic (Tg) line 1 and line 2 showing robust green fluorescence signal but not in hearts from the Tg negative mice. DAPI counterstain shows the nucleus. Scale bar = 100 $\mu$ m. (D) qPCR of transgene (CreERT2) mRNA expression (as fold change over Tg-) in various tissues normalized to *Rp13a* from 8-week-old line 1 and 2 mice. SkM denotes skeletal muscle (quadriceps). Error bars indicate SEM. n = 3. (E) EGFP and sarcomeric actin staining on 8-week-old Tg+ and Tg- hearts from line 1. White arrows and inset highlight enriched areas of EGFP-L10a in the nucleolus. Scale bar = 30 $\mu$ m. Representative images represent data from 2 independent experiments.

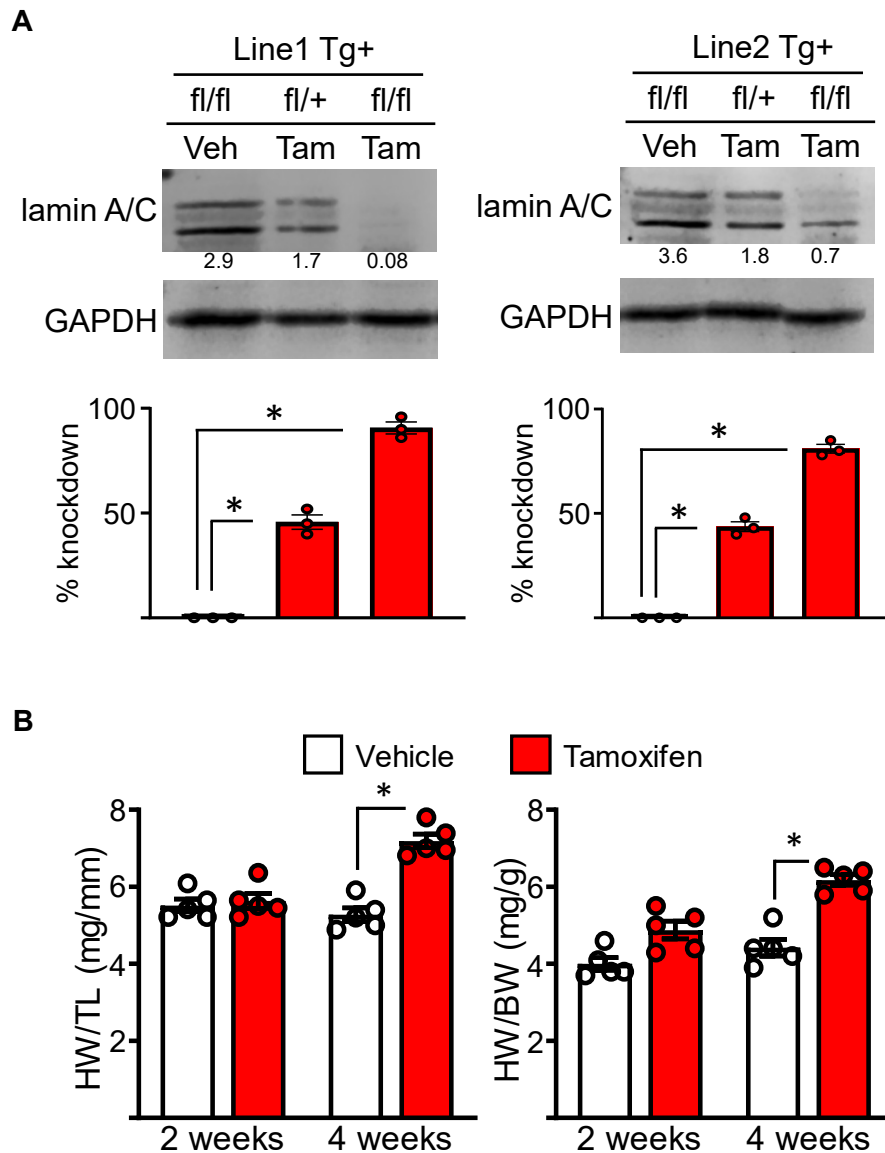

**Supplementary Fig. 2. CM-specific depletion of lamin A/C.** (A) Immunoblot of lamin A/C and GAPDH in CM extracts from Tg+ line 1 (left) and line 2 (right) mice with (+) or without (-) tamoxifen (Tam) administration. fl/fl and fl/+ denote homozygous and heterozygous *Lmna* flox, respectively. The numbers in line with blots denote quantitation of lamin A/C blot normalized to GAPDH in arbitrary units. The bottom shows % knockdown calculation with one-way ANOVA with Dunnett post hoc. n=3. (B) Assessment of heart weight (HW) of CM-CreTRAP:*Lmna*<sup>flox/flox</sup> mice at 2 and 4 weeks post last Tam dosing. The left panel shows the HW relative to tibia length (TL) and the right panel relative to body weight (BW). P values were derived using unpaired, two tailed Student's t test. For all data in this figure, \* = p < 0.0001. Error bars = SEM. n=5.

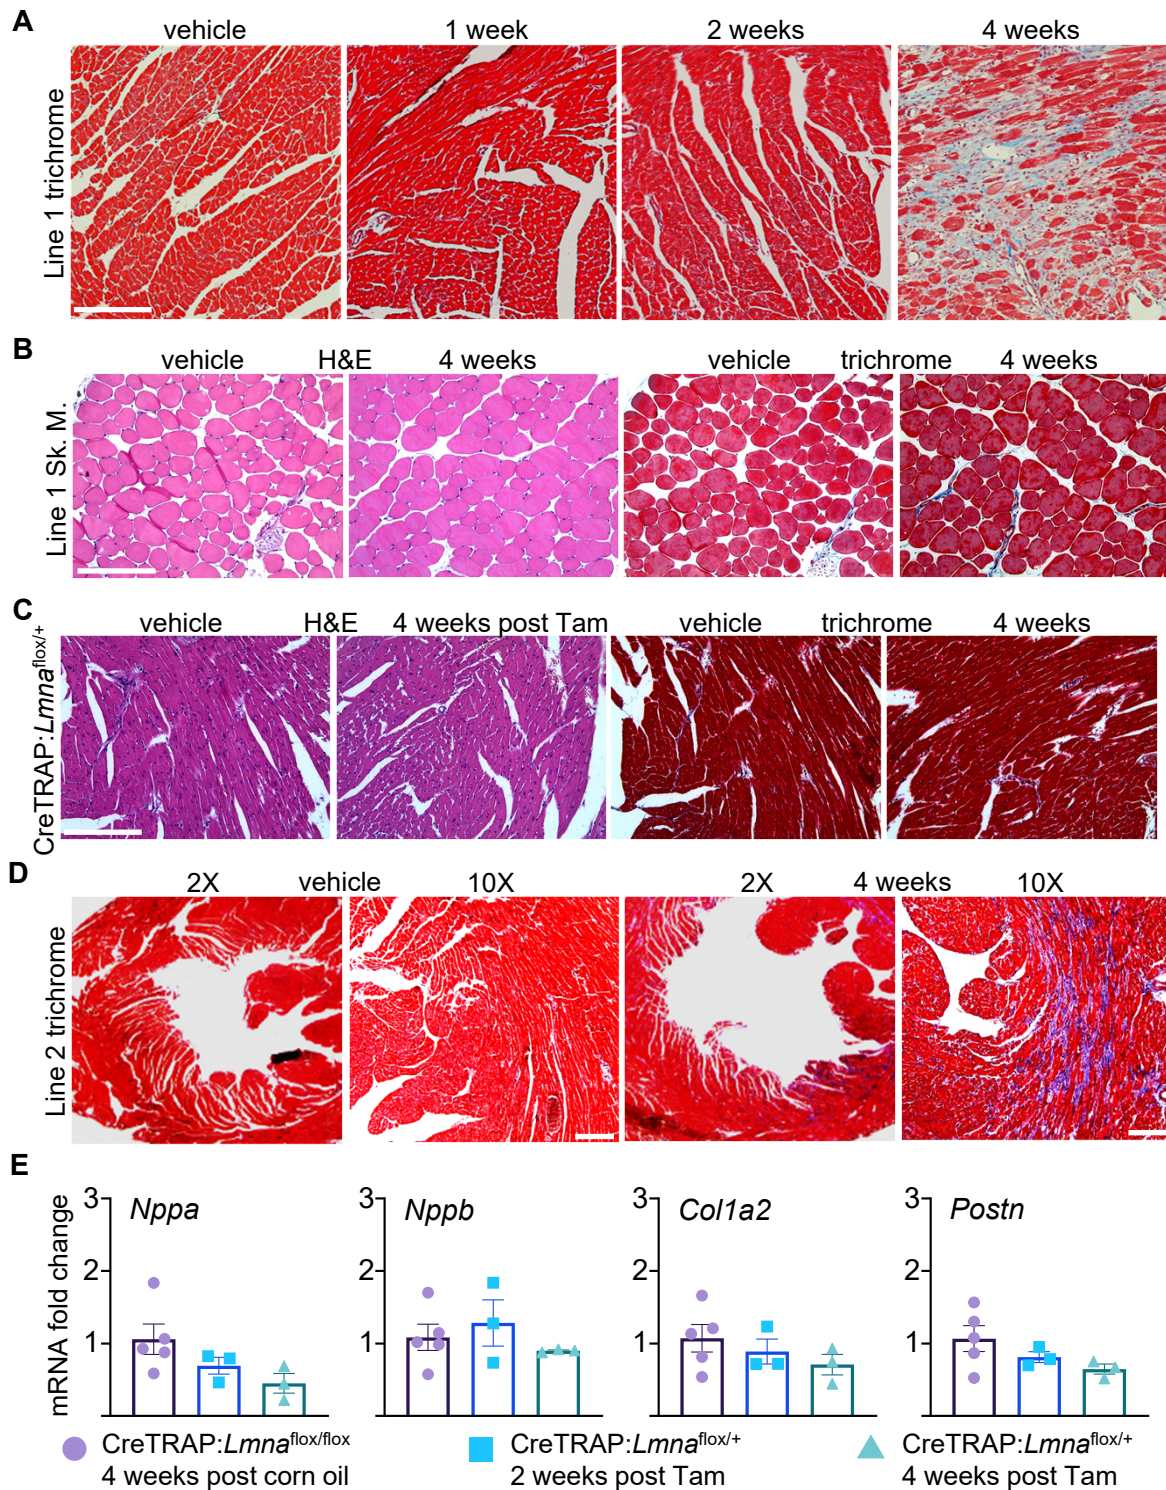

**Supplementary Fig. 3. CM-specific depletion of lamin A/C causes cardiac remodeling.** (A) A representative Masson's trichrome staining of hearts from line 1 CM-CreTRAP:Lnna<sup>lox/lox</sup> mice at 1, 2, and 4 weeks post tamoxifen and vehicle treatment from 3 mice per group (B) A representative hematoxylin and eosin (H&E) and Masson's trichrome staining of quadriceps from line 1 CM-CreTRAP:Lnna<sup>lox/lox</sup> mice at 4 weeks post tamoxifen and vehicle treatment. 3 mice per group. Sk.M. denotes skeletal muscle. (C) H&E and Masson's trichrome staining of hearts from line 1 CM-CreTRAP:Lnna<sup>lox/+</sup> mice at 4 weeks post tamoxifen treatment. Representative images are shown from n = 5 mice per group. (D) Masson's trichrome staining of hearts from line 2 CM-CreTRAP:Lnna<sup>lox/lox</sup> mice at 4 weeks post tamoxifen and vehicle treatment. Representative images are shown from n = 5 mice per group. Scale bars = 200 $\mu$ m. (E) qPCR of cardiac stress and profibrotic marker mRNAs in hearts from vehicle-treated CM-CreTRAP:Lnna<sup>lox/lox</sup> and Tam-treated CM-CreTRAP:Lnna<sup>lox/+</sup> mice. Data normalized to Rpl13a presented as fold change relative to vehicle (Veh). Error bars = SEM. n = 3 – 5 (biological replicates).

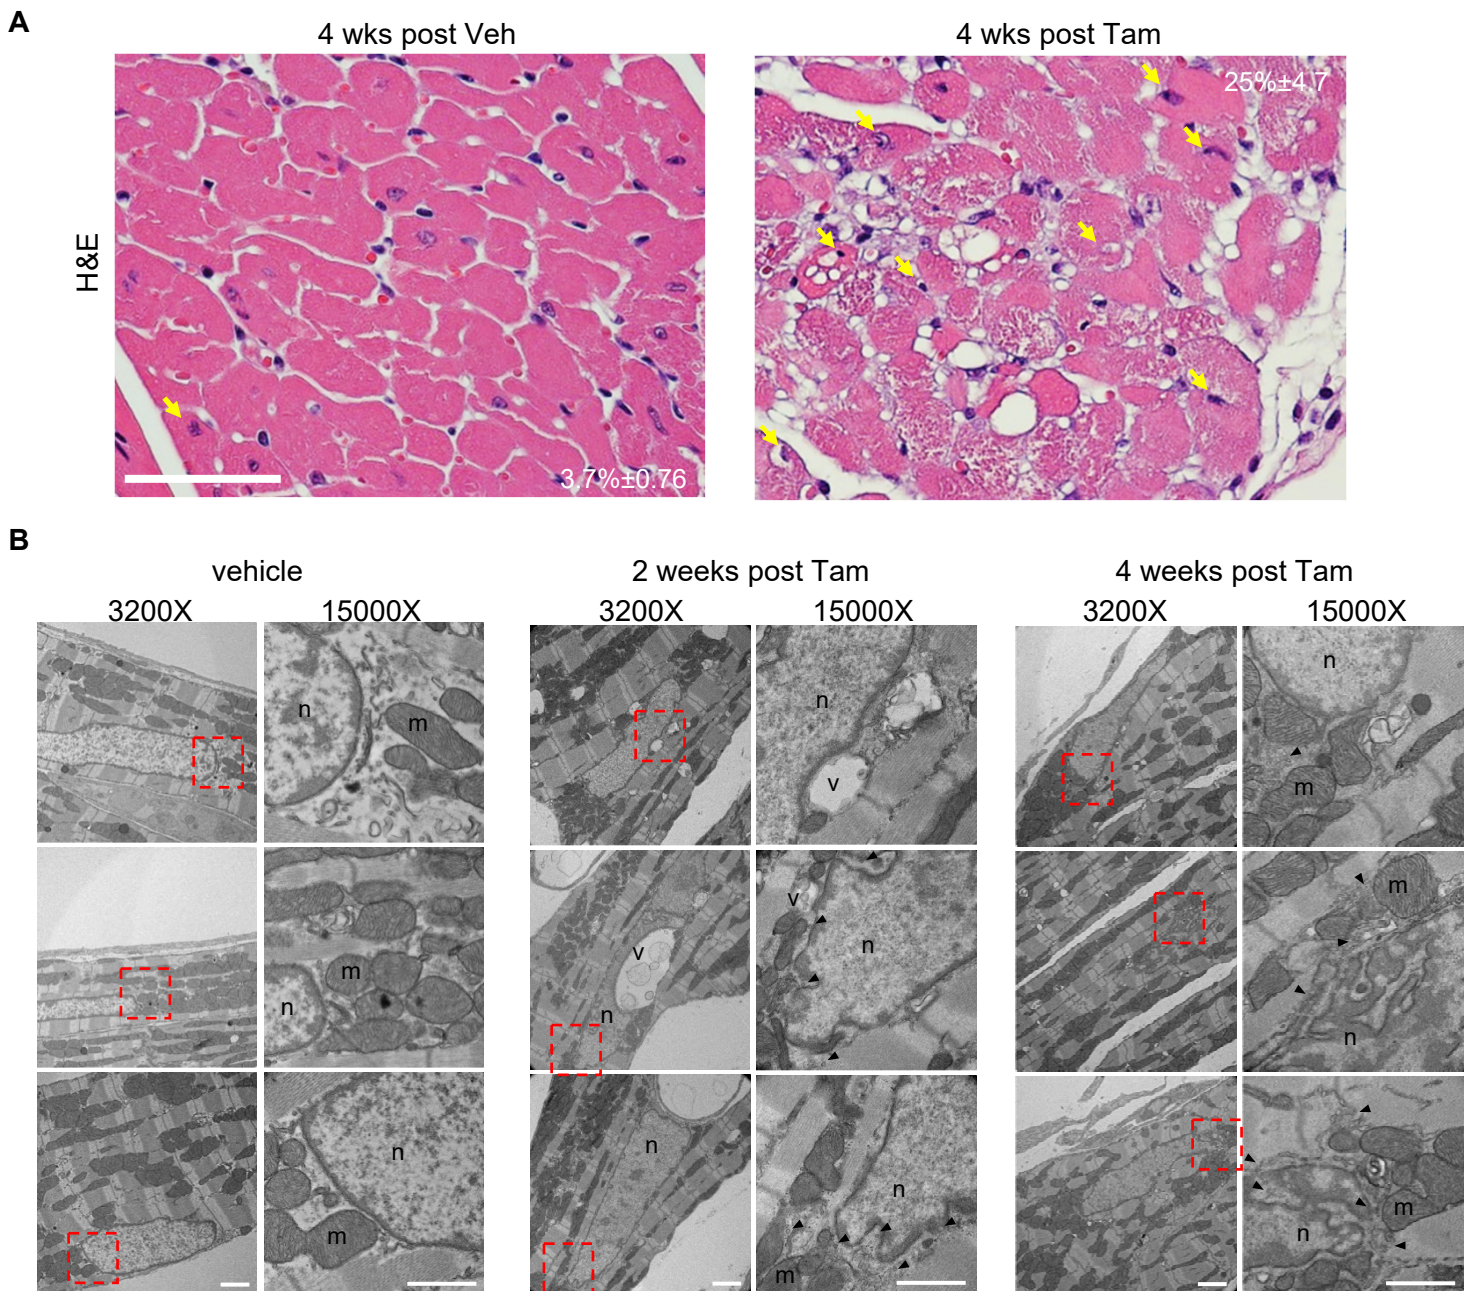

**Supplementary Fig. 4. Perinuclear abnormalities in hearts of CM-specific *Lmna* deleted mice.** (A) H&E staining of hearts from line 1 CM-CreTRAP:*Lmna*<sup>flox/flox</sup> mice at 4 weeks post tamoxifen and vehicle treatment. Yellow arrows denote abnormal nuclei. Numbers in line denote average number ± SEM of abnormal nuclei per field counted from at least 15 fields from 3 mice per group. Scale bar = 50µm. (B) Transmission electron microscopy images of hearts from line 1 CM-CreTRAP:*Lmna*<sup>flox/flox</sup> mice treated with vehicle, 2 weeks, and 4 weeks post tamoxifen treatment. Dotted box denotes the area shown in the higher magnification (15000X) image. Scale bar = 1 µm. Black arrowheads denote 100 nm vesicles. n = nucleus, m = mitochondria, v = vacuoles. (C) Quantitation of EM images showing % of normal and abnormal nuclei from their respective groups. N = total number of nuclei counted from 2 independent hearts per group.

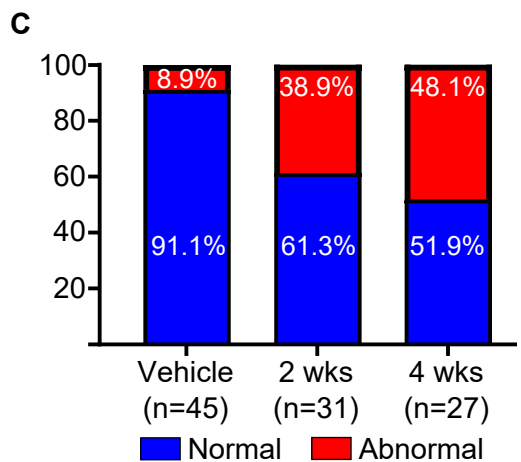

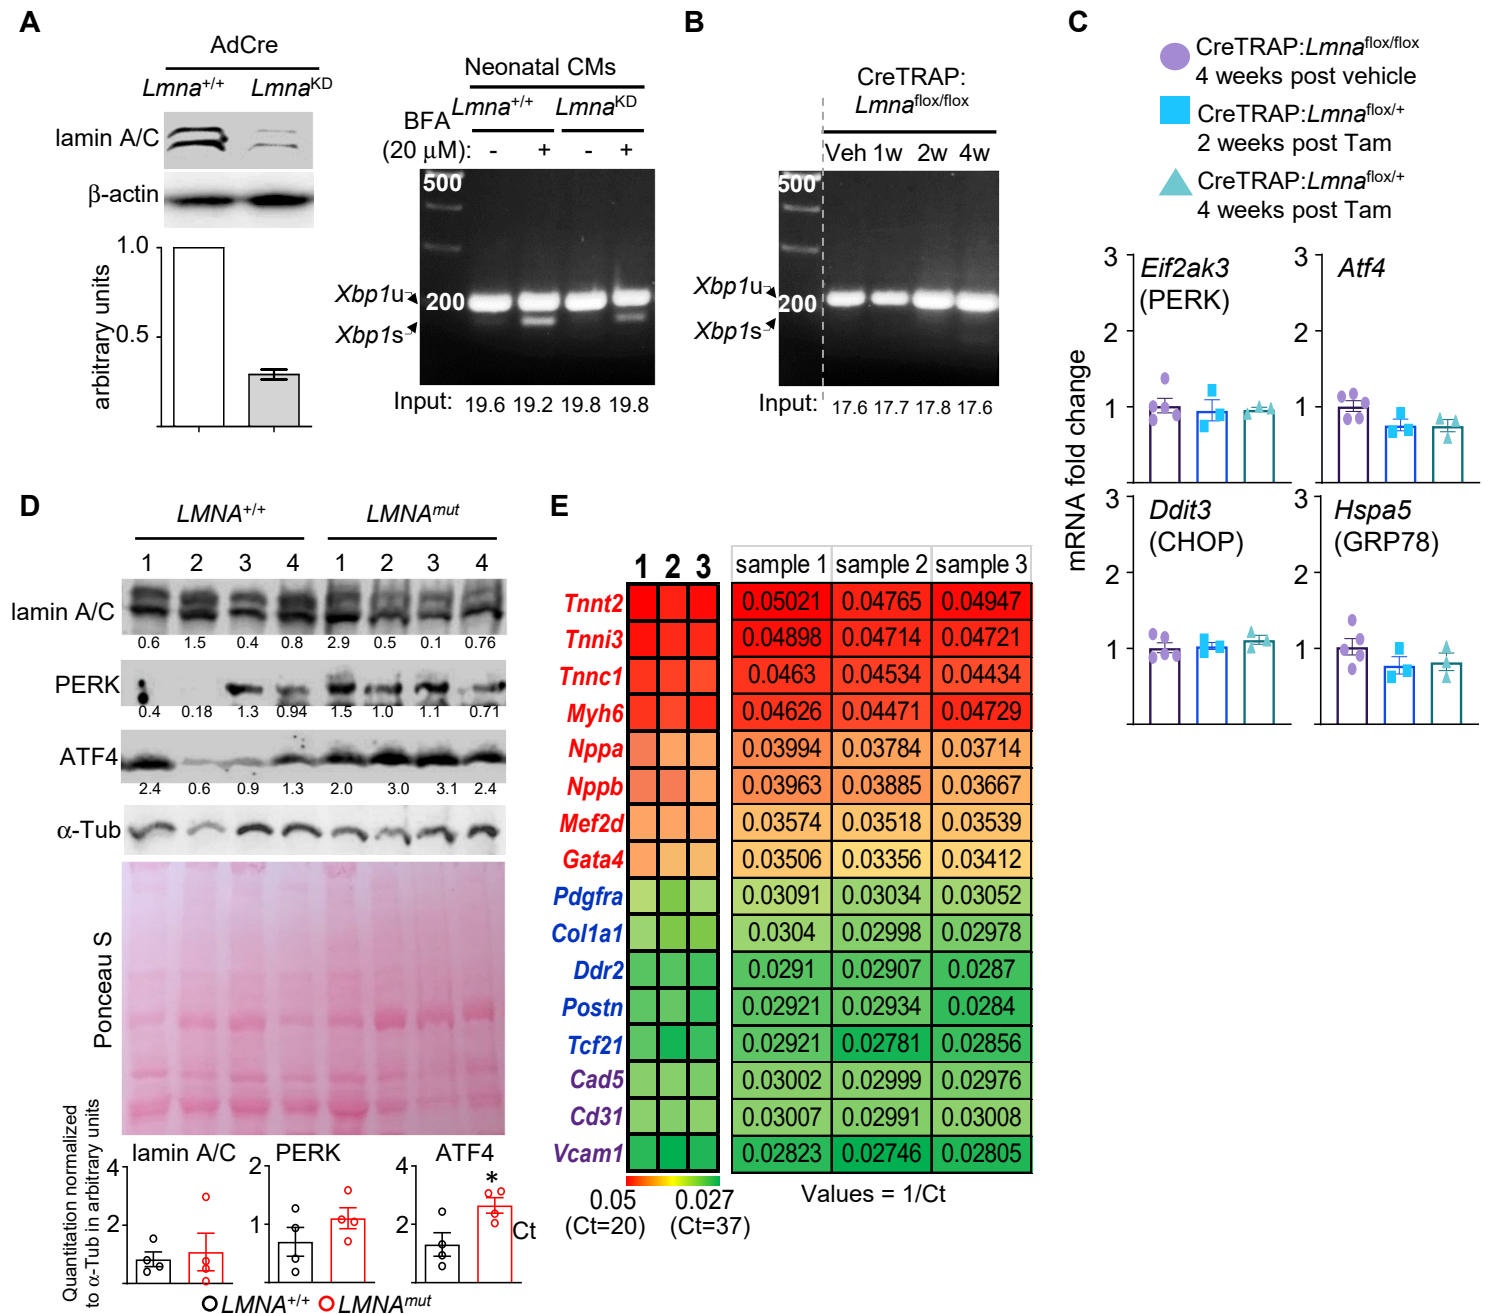

**Supplementary Fig. 5. Cardiac perturbations in CM-specific *Lmna* deleted mice.** (A) (Left panel) Immunoblot of lamin A/C and  $\beta$ -actin in AdCre-treated nCMs from *Lmna*<sup>+/+</sup> and *Lmna*<sup>flox/flox</sup> (*Lmna*<sup>KD</sup>) mice. Quantitation of blots are shown on the bottom. (Right panel) RT-PCR analyses of *Xbp1* mRNA splicing in 24 hr brefeldin A (BFA)-treated *Lmna*<sup>+/+</sup> and *Lmna*-deleted neonatal CMs. *Xbp1u* and *Xbp1s* denote unspliced and spliced variants, respectively. Input denotes CT values for internal control *Rpl13a*. Representative images from 3 independent experiments are shown. (B) RT-PCR analyses of *Xbp1* mRNA splicing in the hearts from CM-CreTRAP:*Lmna*<sup>flox/flox</sup> mice treated with vehicle (Veh) or Tam, similar to those shown in Supplementary Fig. 4b. Input denotes CT values for internal control *Gapdh*. (C) qPCR of unfolded protein response marker mRNAs in hearts from vehicle-treated CM-CreTRAP:*Lmna*<sup>flox/flox</sup> and Tam-treated CM-CreTRAP:*Lmna*<sup>flox/+</sup> mice at 2 and 4 weeks post tamoxifen treatment. Data normalized to *Rpl13a* presented as fold change relative to vehicle (Veh). Error bars = SEM. n = 3 - 5. (D) Immunoblot of lamin A/C, PERK, and ATF4 on human hearts with quantitation (normalized to  $\alpha$ -tubulin) on the bottom. Numbers on top of blots denote individual heart samples (biological replicates). Ponceau S stain was used to assess even loading. \* denotes p = 0.03 using unpaired, two-tailed Student's t test. Error bars = SEM. (E) qPCR data on TRAP mRNA (n=3) in the hearts from CM-CreTRAP:*Lmna*<sup>flox/flox</sup> mice 2 weeks post vehicle or Tam treatment. Primers recognizing genes specifically expressed in CMs (red), cardiac fibroblasts (blue), and endothelial cells (purple) were used and presented as 1/cycle threshold (Ct) for each genes from 100ng TRAP mRNA. The actual values are shown on the right panel.

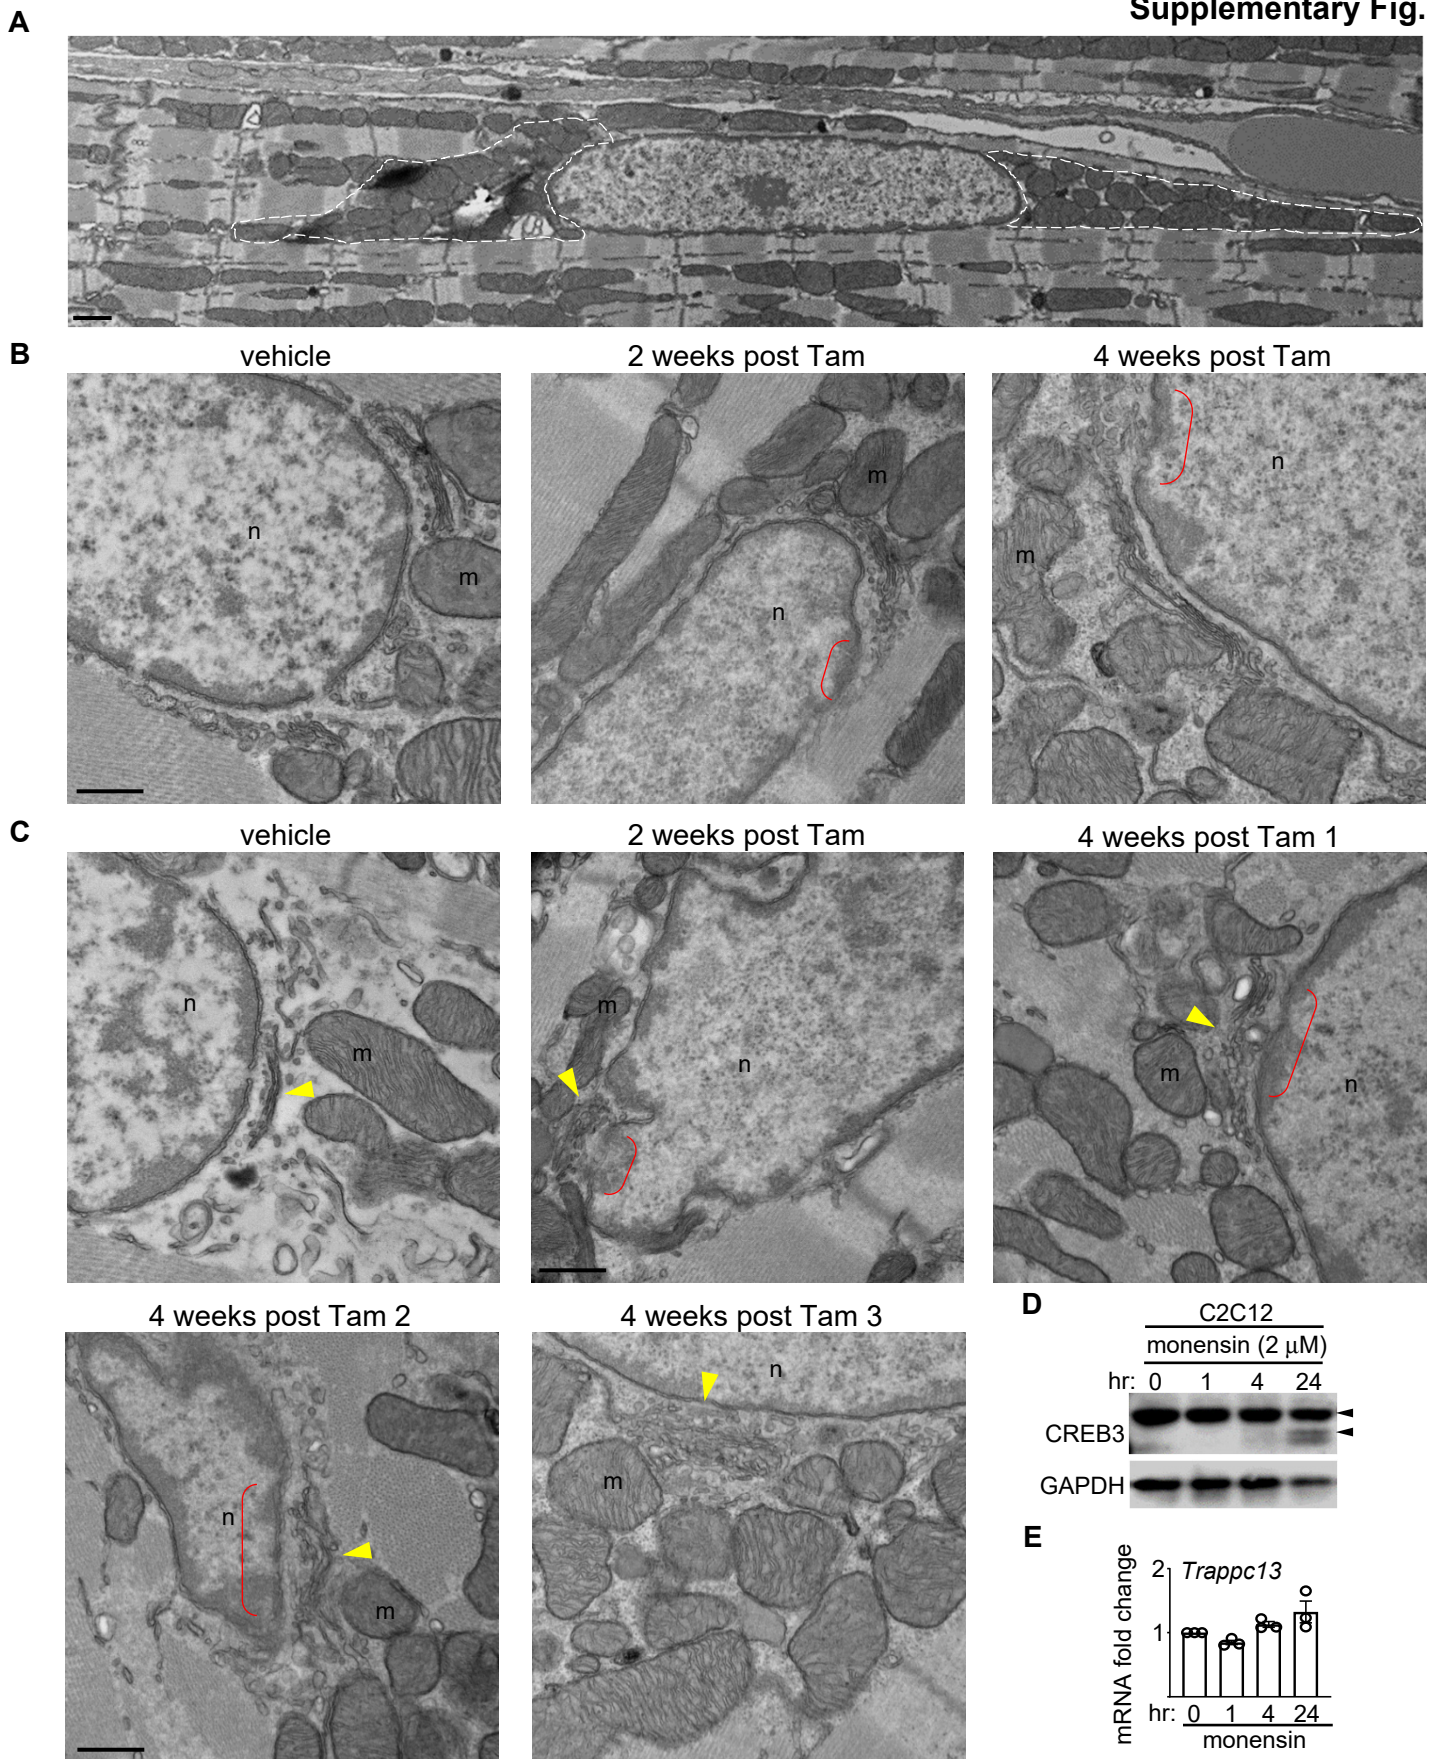

**Supplementary Fig. 6. Golgi abnormalities in hearts of CM-specific *Lmna* deleted mice.** (A) EM image of an adult CM showing perinuclear mitochondria highlighted by dashed lines. All scale bar in this figure = 500 nm. (B) Uncropped images of transmission electron microscopy images of hearts from line 1 CM-CreTRAP:*Lmna*<sup>flox/flox</sup> mice treated with vehicle, 2 weeks, and 4 weeks post tamoxifen treatment from Fig. 4A. Red brackets show area of nuclear envelope deterioration. n = nucleus, m = mitochondria. (C) Additional EM images showing abnormal golgi (yellow arrowheads) in hearts from CM-CreTRAP:*Lmna*<sup>flox/flox</sup> mice treated with vehicle, 2 weeks, and 4 weeks post tamoxifen. Red brackets show area of nuclear envelope deterioration. (D) Representative immunoblot of CREB3 and GAPDH in C2C12 cells treated with 2  $\mu$ M monensin for 1, 4, and 24 hrs from 3 independent experiments. 0 hr denotes vehicle treatment (EtOH). Black arrowheads denote CREB3 and its fragments. (E) qPCR analysis of MEFs treated with 2  $\mu$ M monensin for 0, 1, 4, and 24 hrs probed for *Trappc13*. n=3. Error bars denote SEM.

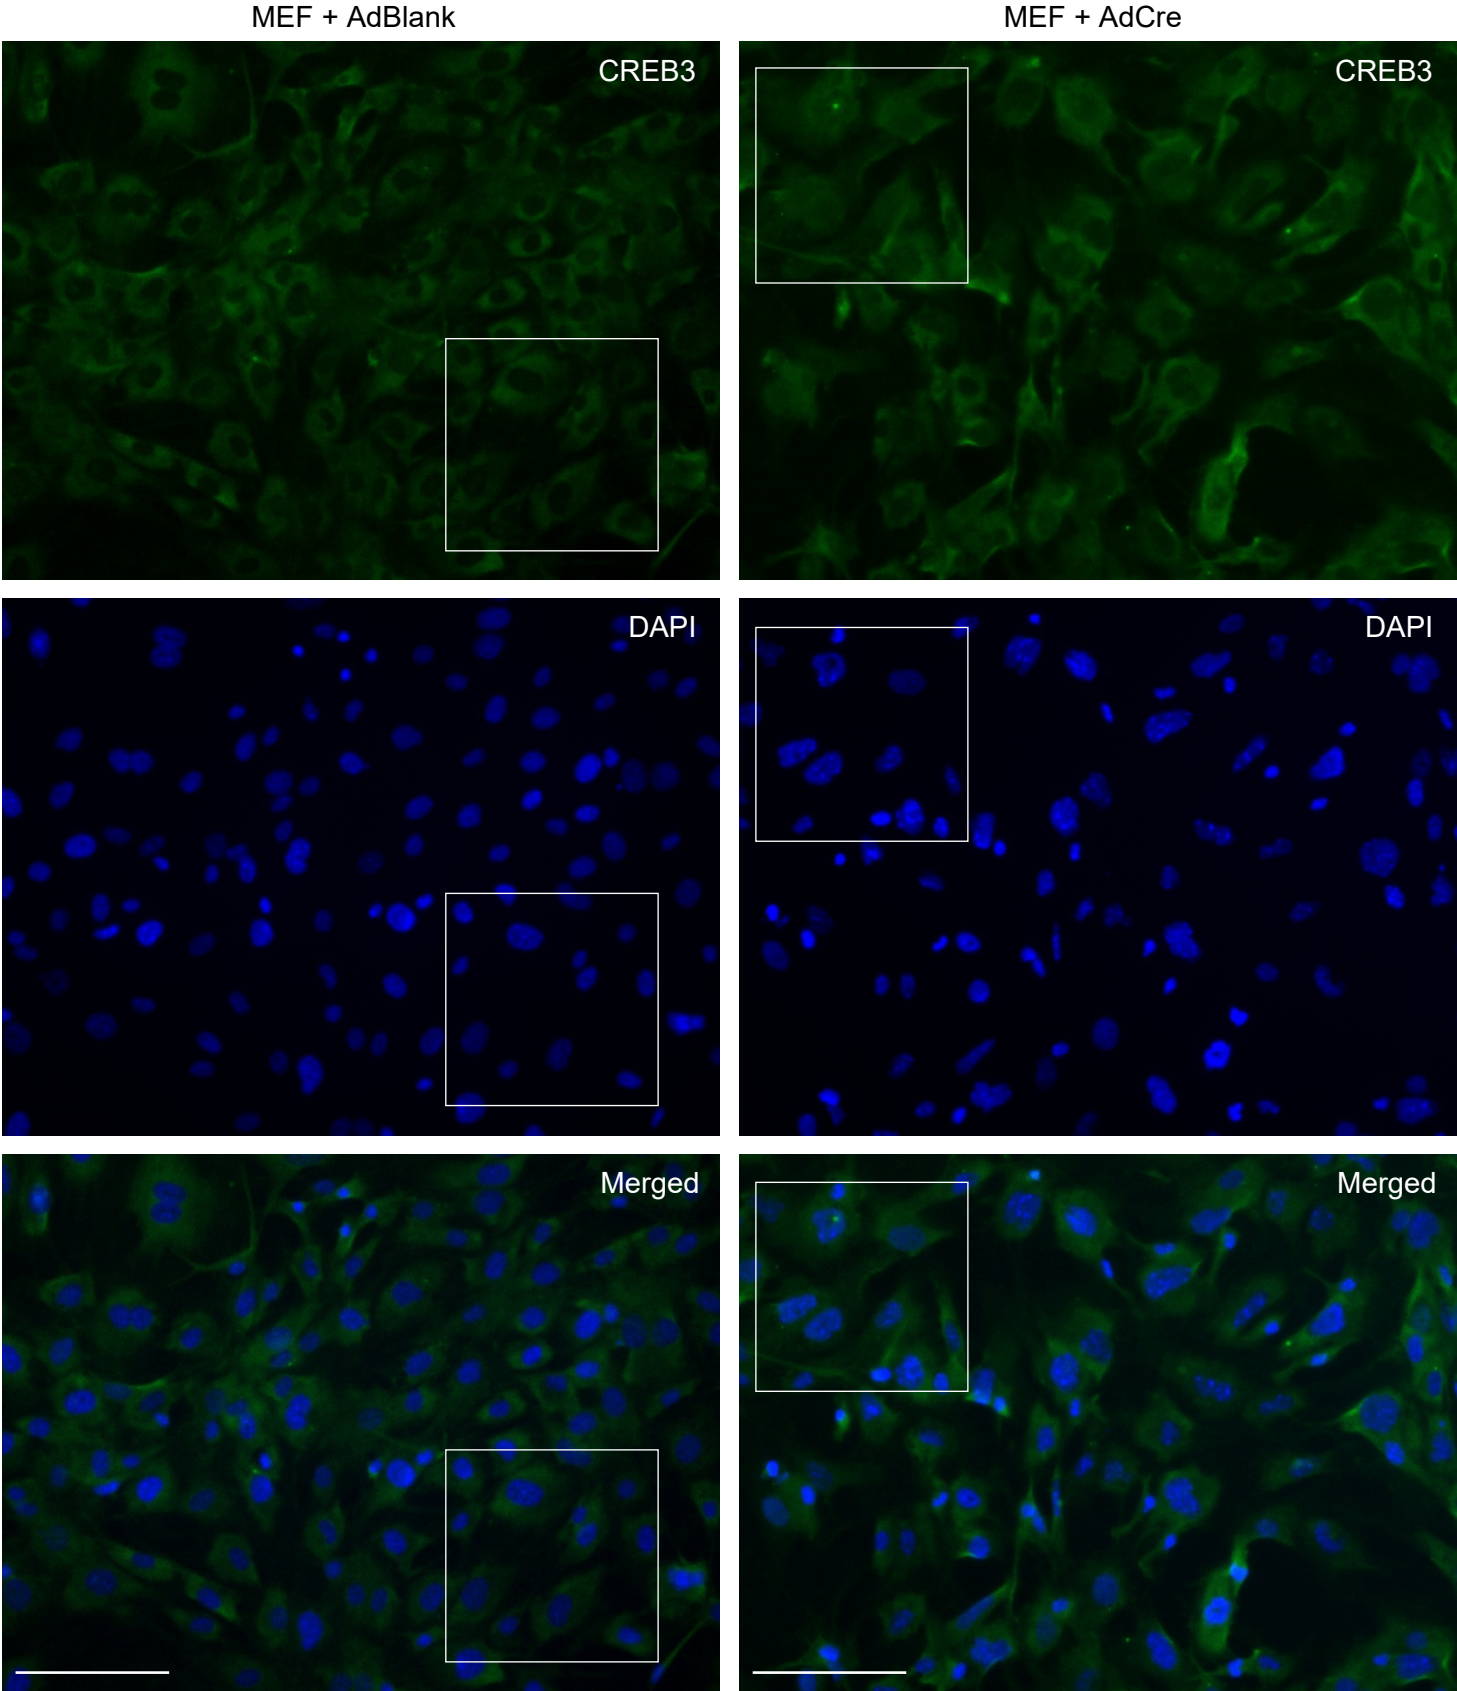

**Supplementary Fig. 7. Uncropped images shown in Figure 4E. White boxes denote the region shown in Fig. 4E. Scale bar = 100  $\mu$ m**



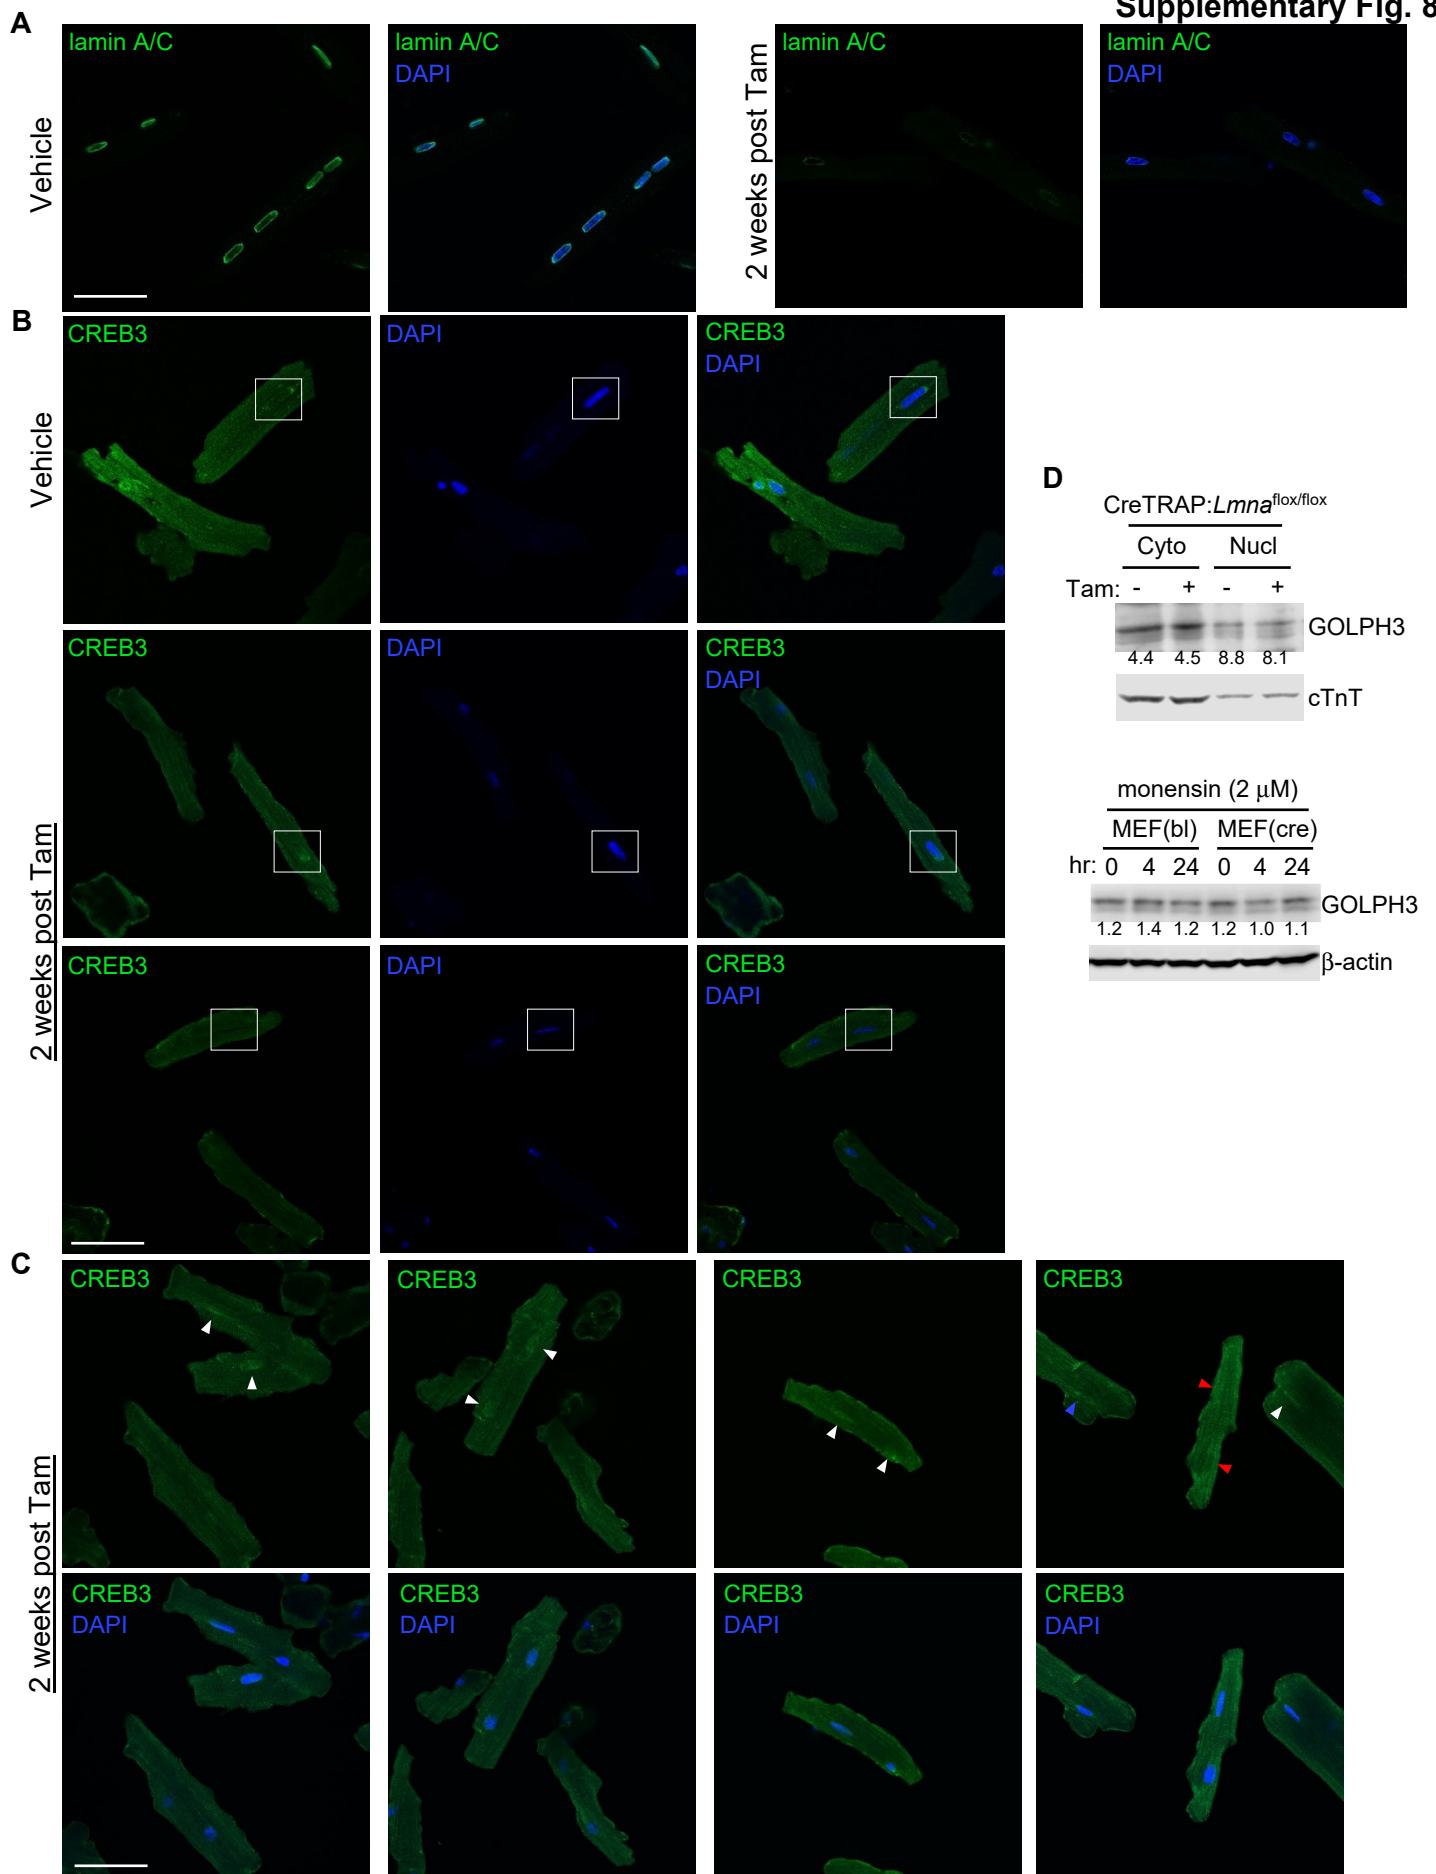

**Supplementary Fig. 8. CREB3 localization to the nucleus in adult CMs with *Lmna* deletion.** (A) Immunofluorescence images of adult CMs from hearts of CM-CreTRAP mice treated with Tam stained for lamin A/C and DAPI. (B) Uncropped images of adult CMs from hearts of vehicle or Tam-treated CM-CreTRAP mice stained for CREB3 and DAPI as shown in Fig. 4F. (C) Additional uncropped images of adult CMs from hearts of Tam-treated CM-CreTRAP mice stained for CREB3 and DAPI. Scale bar = 50 $\mu$ m. Blue, red, and white arrowheads denote perinuclear, undetected, and intranuclear CREB3, respectively. (D) Representative GOLPH3 immunoblot on nuclear/cytoplasmic extracts from primary CMs at 2 week post Tam (+) or vehicle (-) (top) and monensin-treated MEFs infected with AdBI (bl) or AdCre (cre) for 5 days (bottom). Numbers below blots denote GOLPH3 quantification normalized to internal controls in arbitrary units. n=2 experiments.

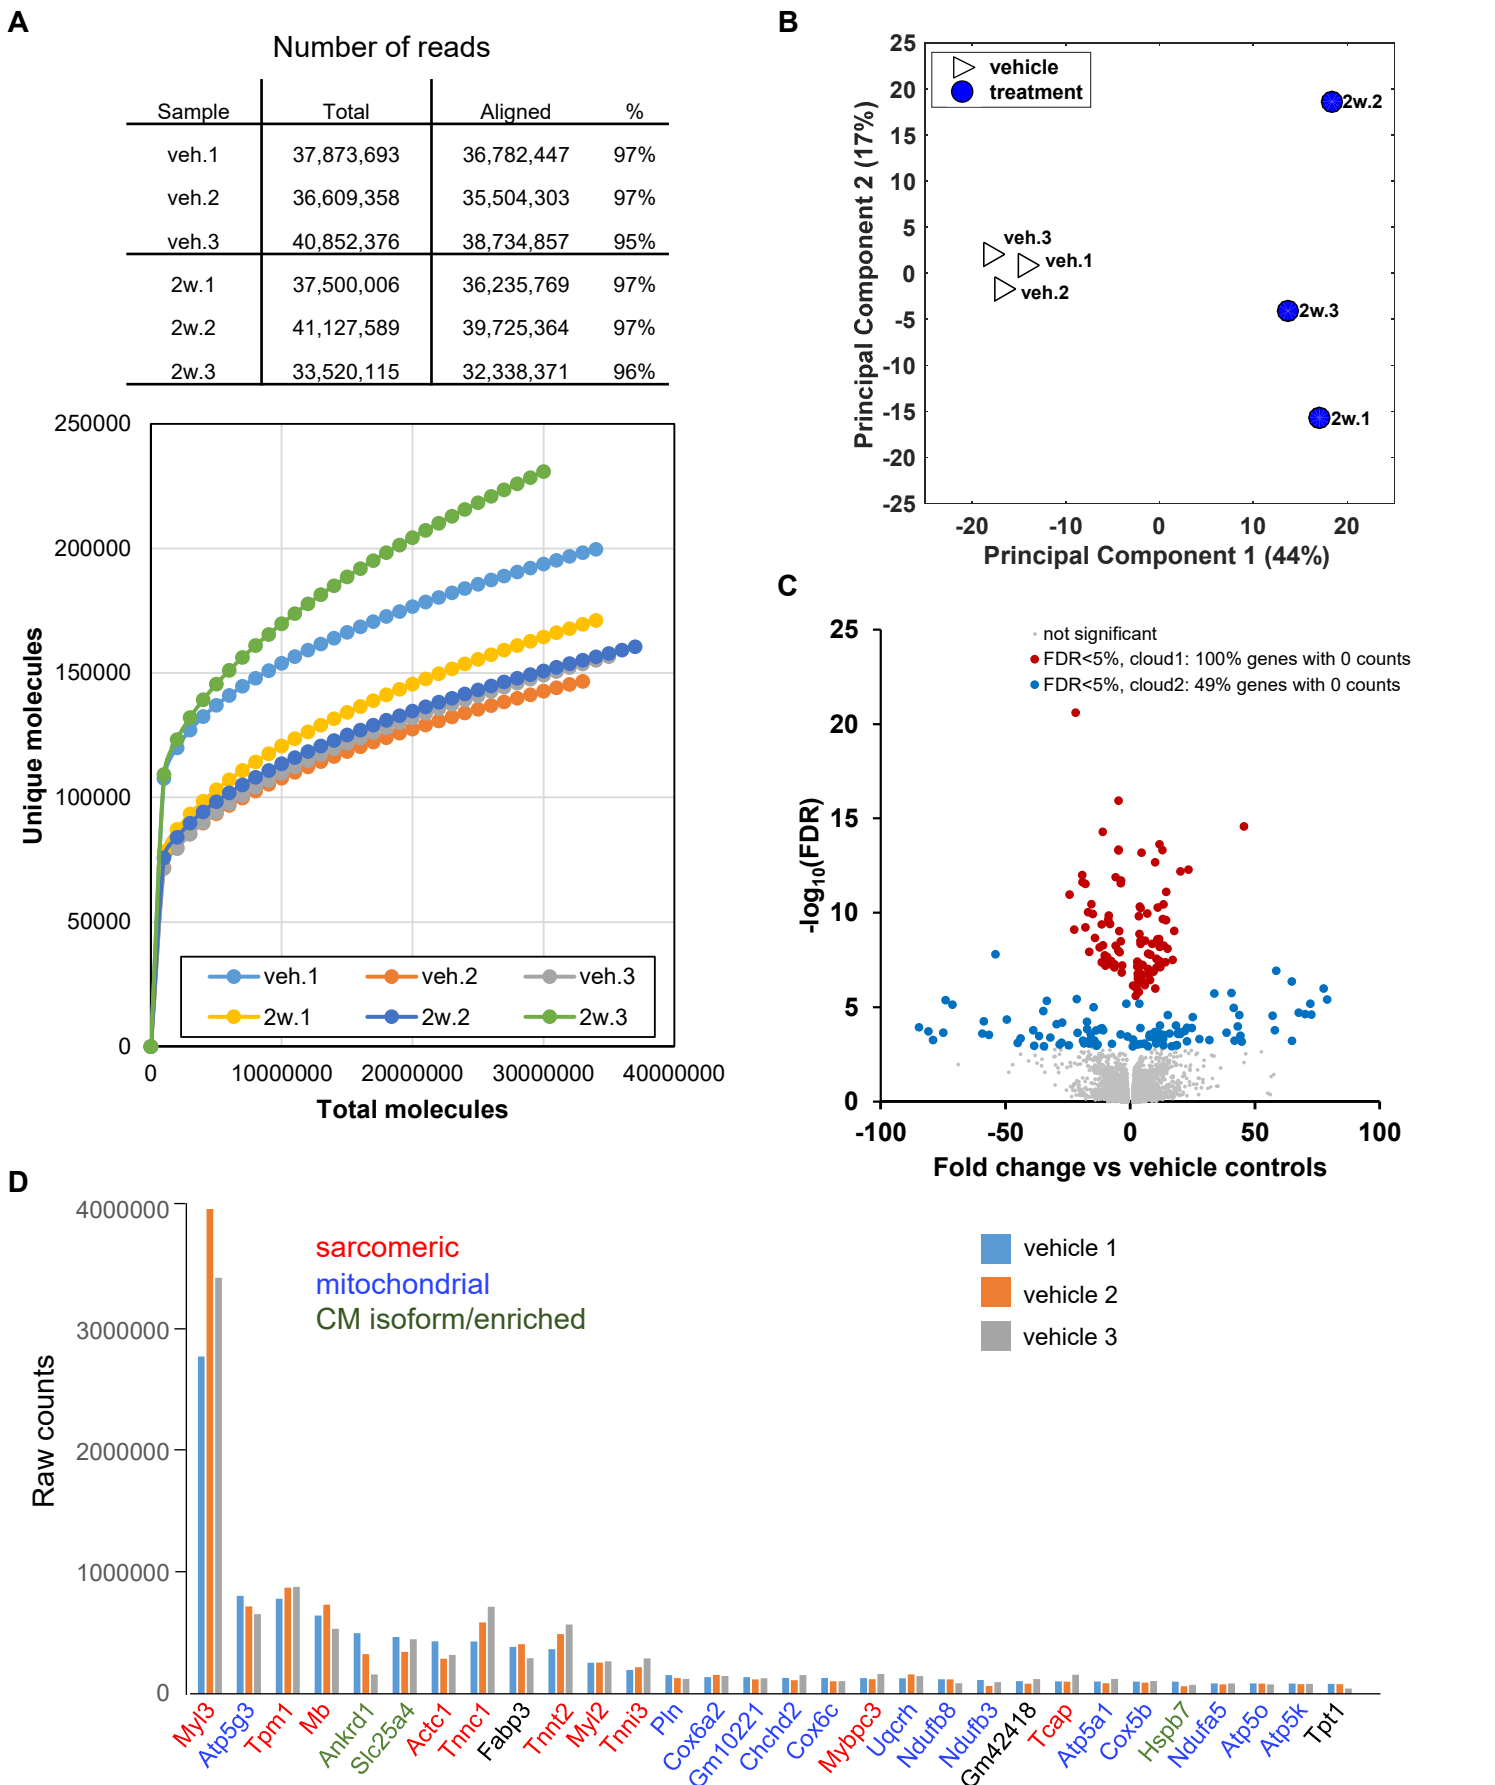

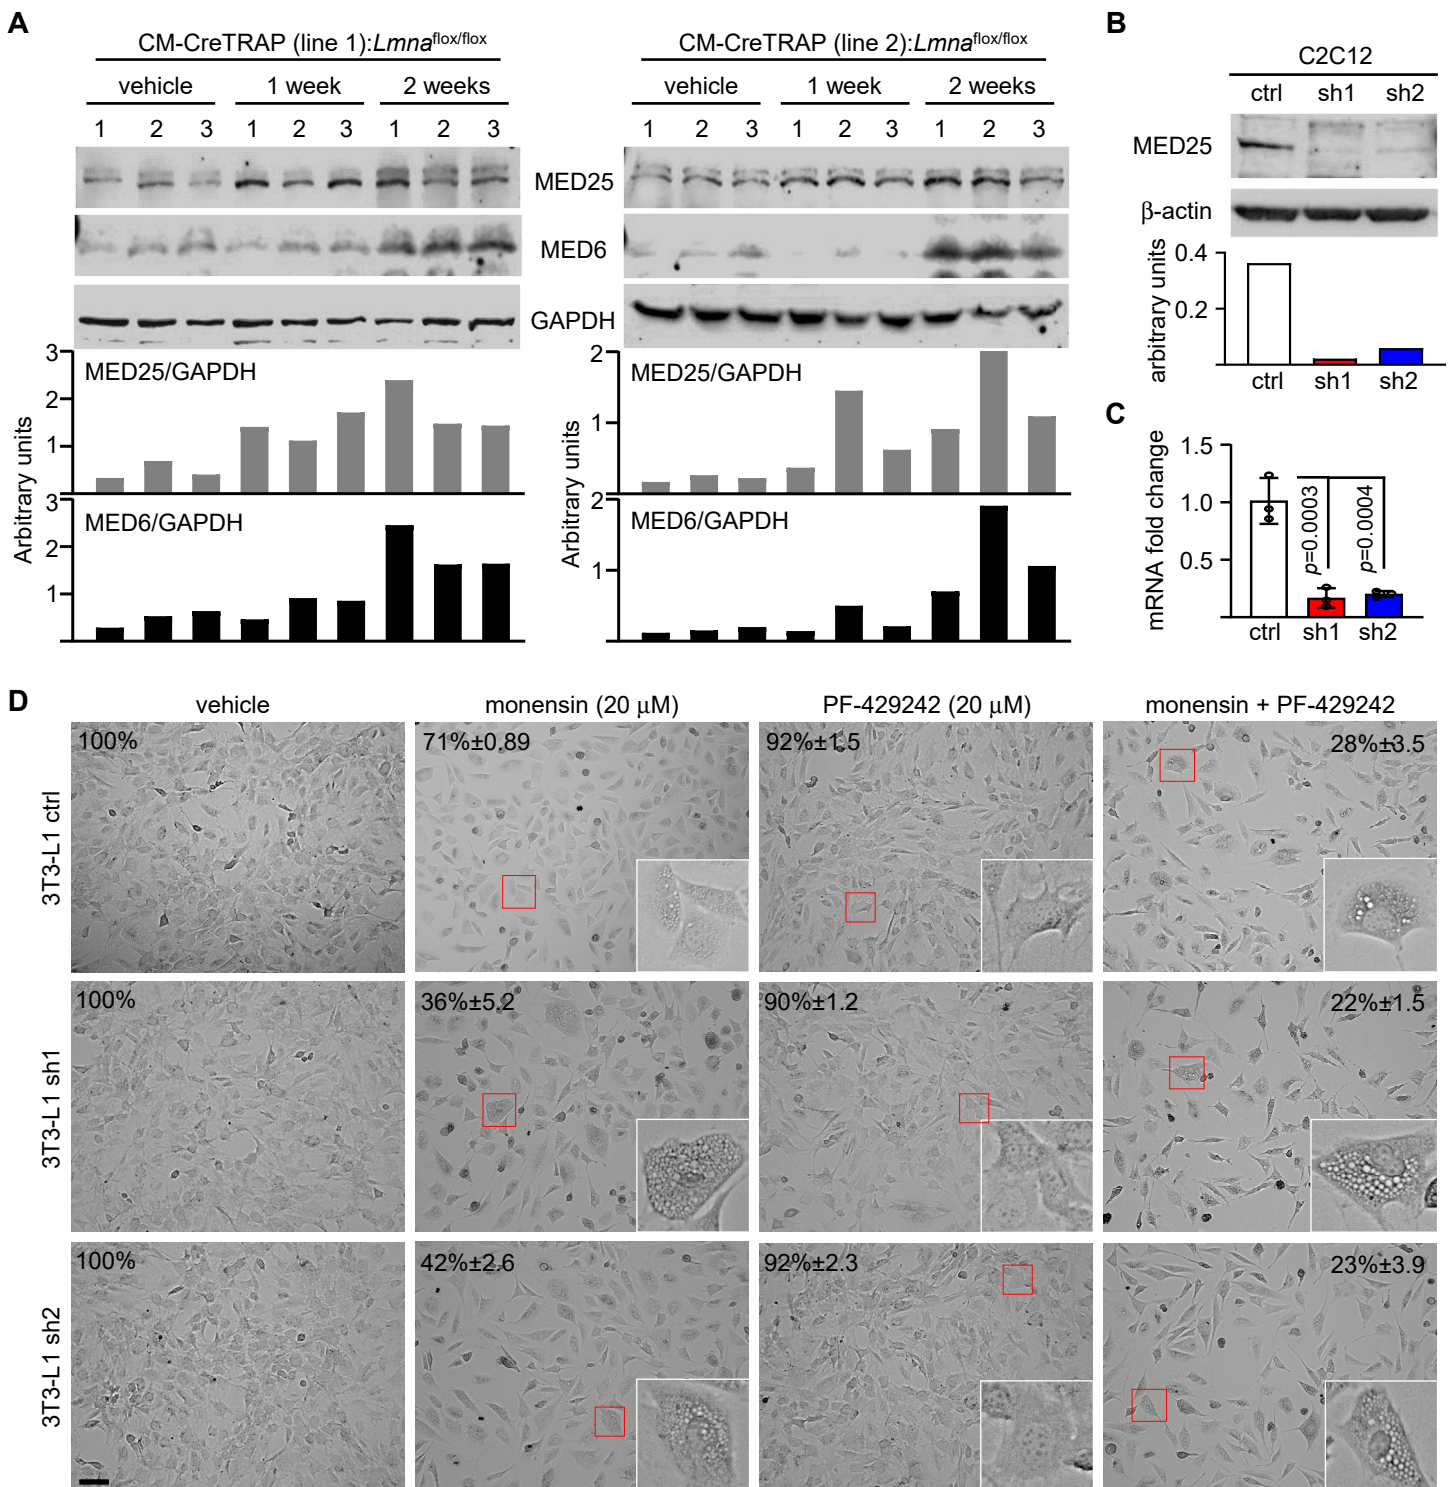

**Supplementary Fig. 10. MED25 and its role in response to monensin-induced Golgi stress.** (A) Immunoblot analysis of MED6, MED25, and GAPDH on the heart extracts from line 1 (left) and line 2 (right) CM-CreTRAP:*Lmna*<sup>flx/flx</sup> mice at 1 and 2 weeks post Tam treatment or vehicle alone (4W Tam). Numbers on top of blots denote individual heart samples. Bottom panel shows quantitation of blots normalized to GAPDH. (B) A representative immunoblot of MED25 and β-actin in nuclear extracts from C2C12 cells expressing two independent shRNAs (sh1 and sh2) that target *Med25* from 2 independent experiments. Bottom panel shows quantitation of MED25 levels normalized to β-actin. (C) qPCR analysis confirming *Med25* expression knockdown at the mRNA level. Error bars = SEM. n=3. p values were derived using one-way ANOVA with Dunnett post hoc. (D) 3T3-L1 with sh1/2-mediated *Med25* knockdown treated with monensin, site-1 protease inhibitor PF-429242, or in combination. The numbers in line denote % cell viability ± SEM from n=3 experiments. The insets (represented by red boxes) show magnified images showing the presence (or absence) of vacuolation. Ctrl denotes 3T3-L1 cells infected with lentivirus generated from empty vector. Scale bar = 20 μm.

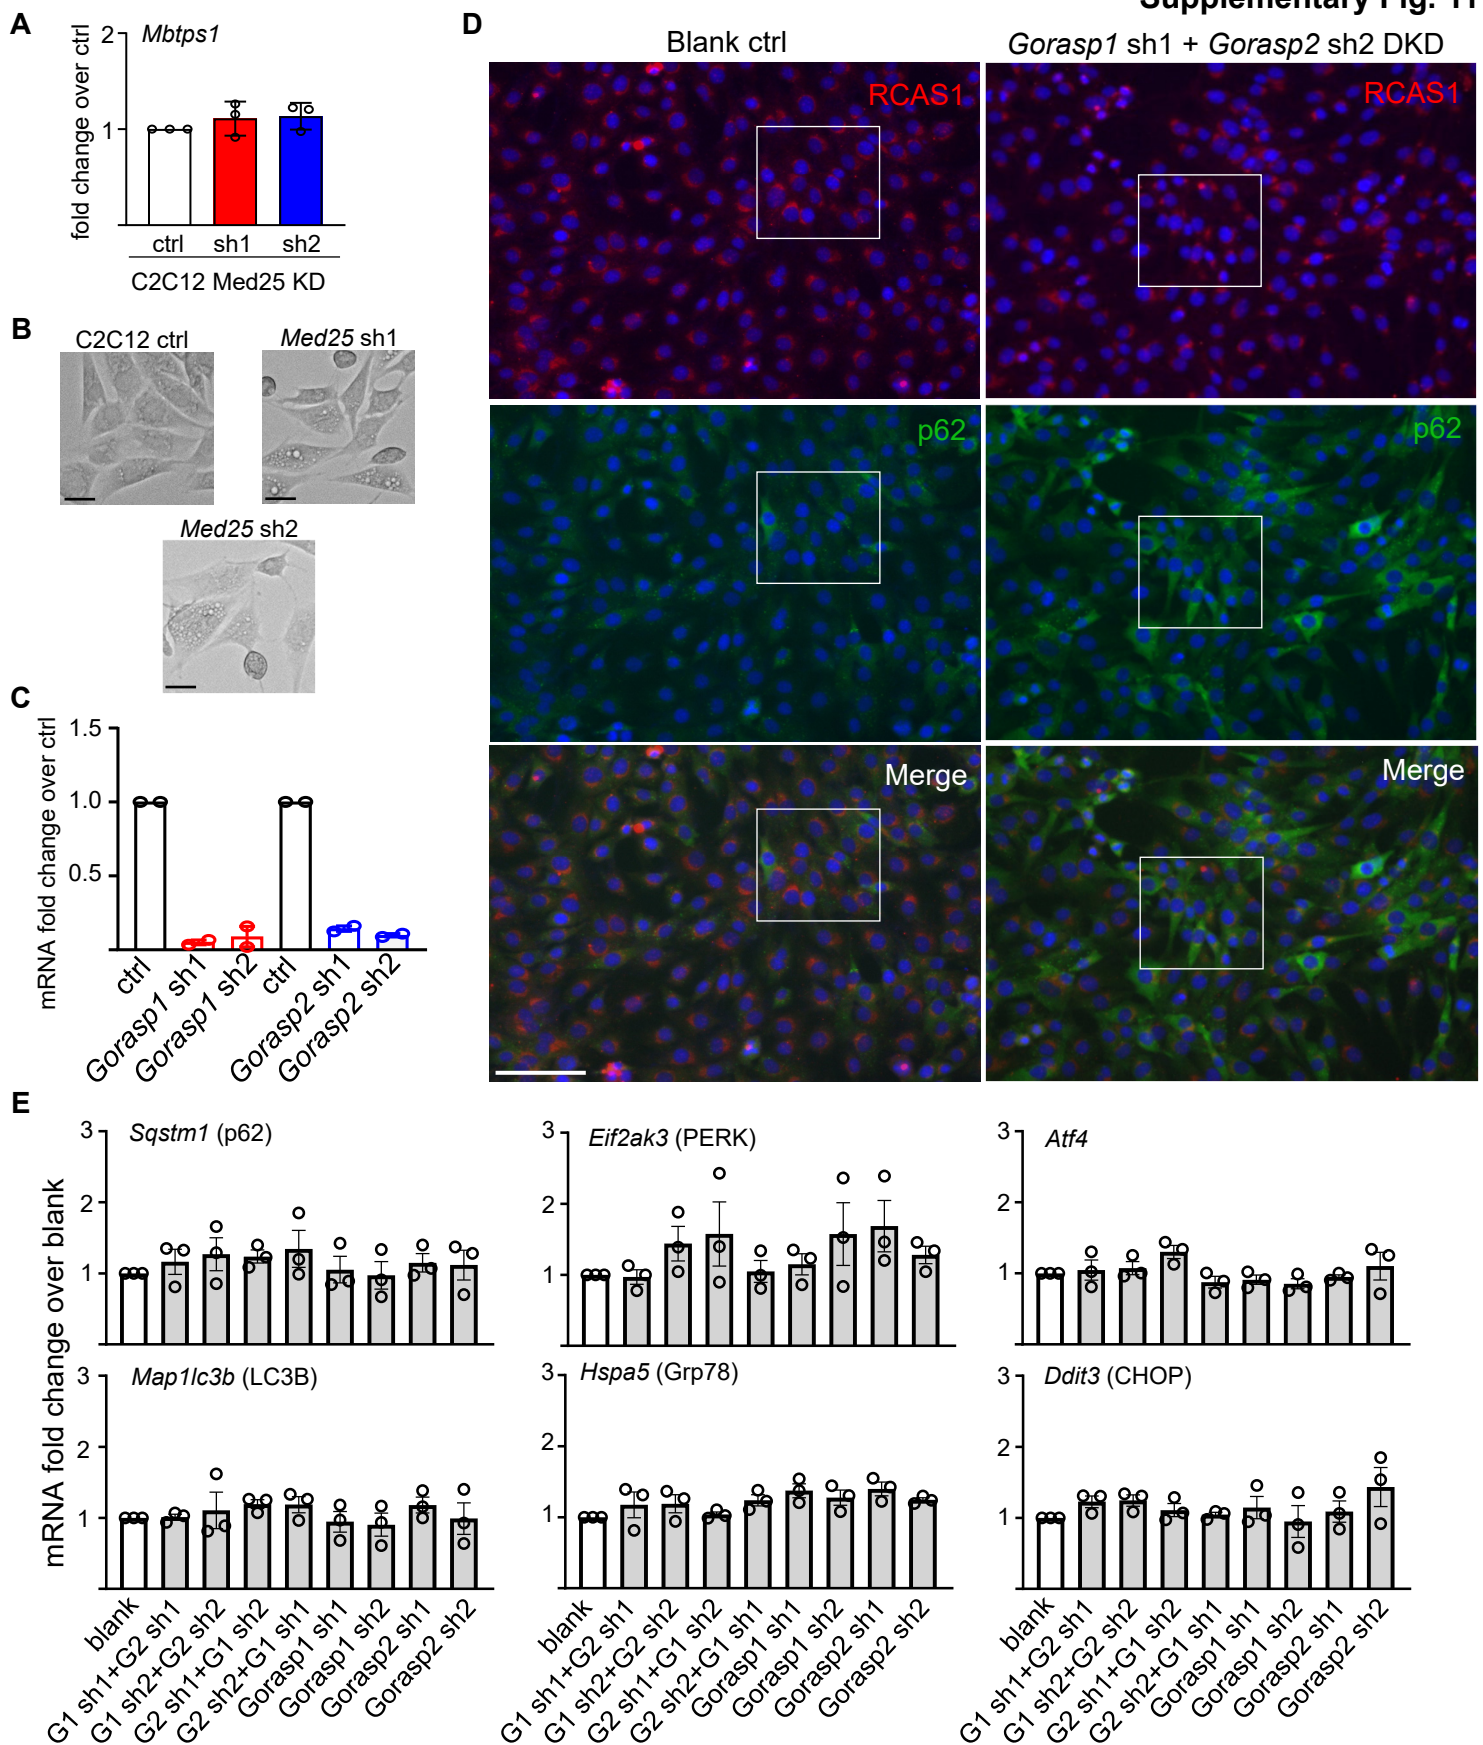

**Supplementary Fig. 11. Golgi disruption in C2C12 culture model.** (A) qPCR analyses of *Mbtps1* in C2C12 with *Med25* KD from two short hairpin RNA (sh1 and sh2). Data presented as fold change relative to ctrl (set to 1).  $n=3$ . (B) Representative micrographs of control and *Med25* KD C2C12 cells treated with 40  $\mu\text{M}$  nigericin for 24 hr from  $n=3$  experiments. Scale bar = 10  $\mu\text{m}$ . (C) qPCR analyses of *Gorasp1* and *Gorasp2* knockdown in C2C12 using lentiviruses to deliver two independent shRNAs for each gene. Fold change values were derived using ctrl, which is C2C12 infected with lentivirus carrying blank shRNA, as reference. Error bars = SEM.  $n=2$  experiments. (D) Uncropped images shown in Fig. 6c. Boxes show the cropped borders. Scale bar = 100  $\mu\text{m}$ . (E) qPCR analyses on C2C12 cells with *Gorasp1* and *Gorasp2* knockdown probed for genes involved in UPR (*Eif2ak3*, *Atf4*, *Ddit3*, and *Hspa5*) and autophagy (*Sqstm1* and *Map1lc3b*). Error bars = SEM.  $n=3$ .

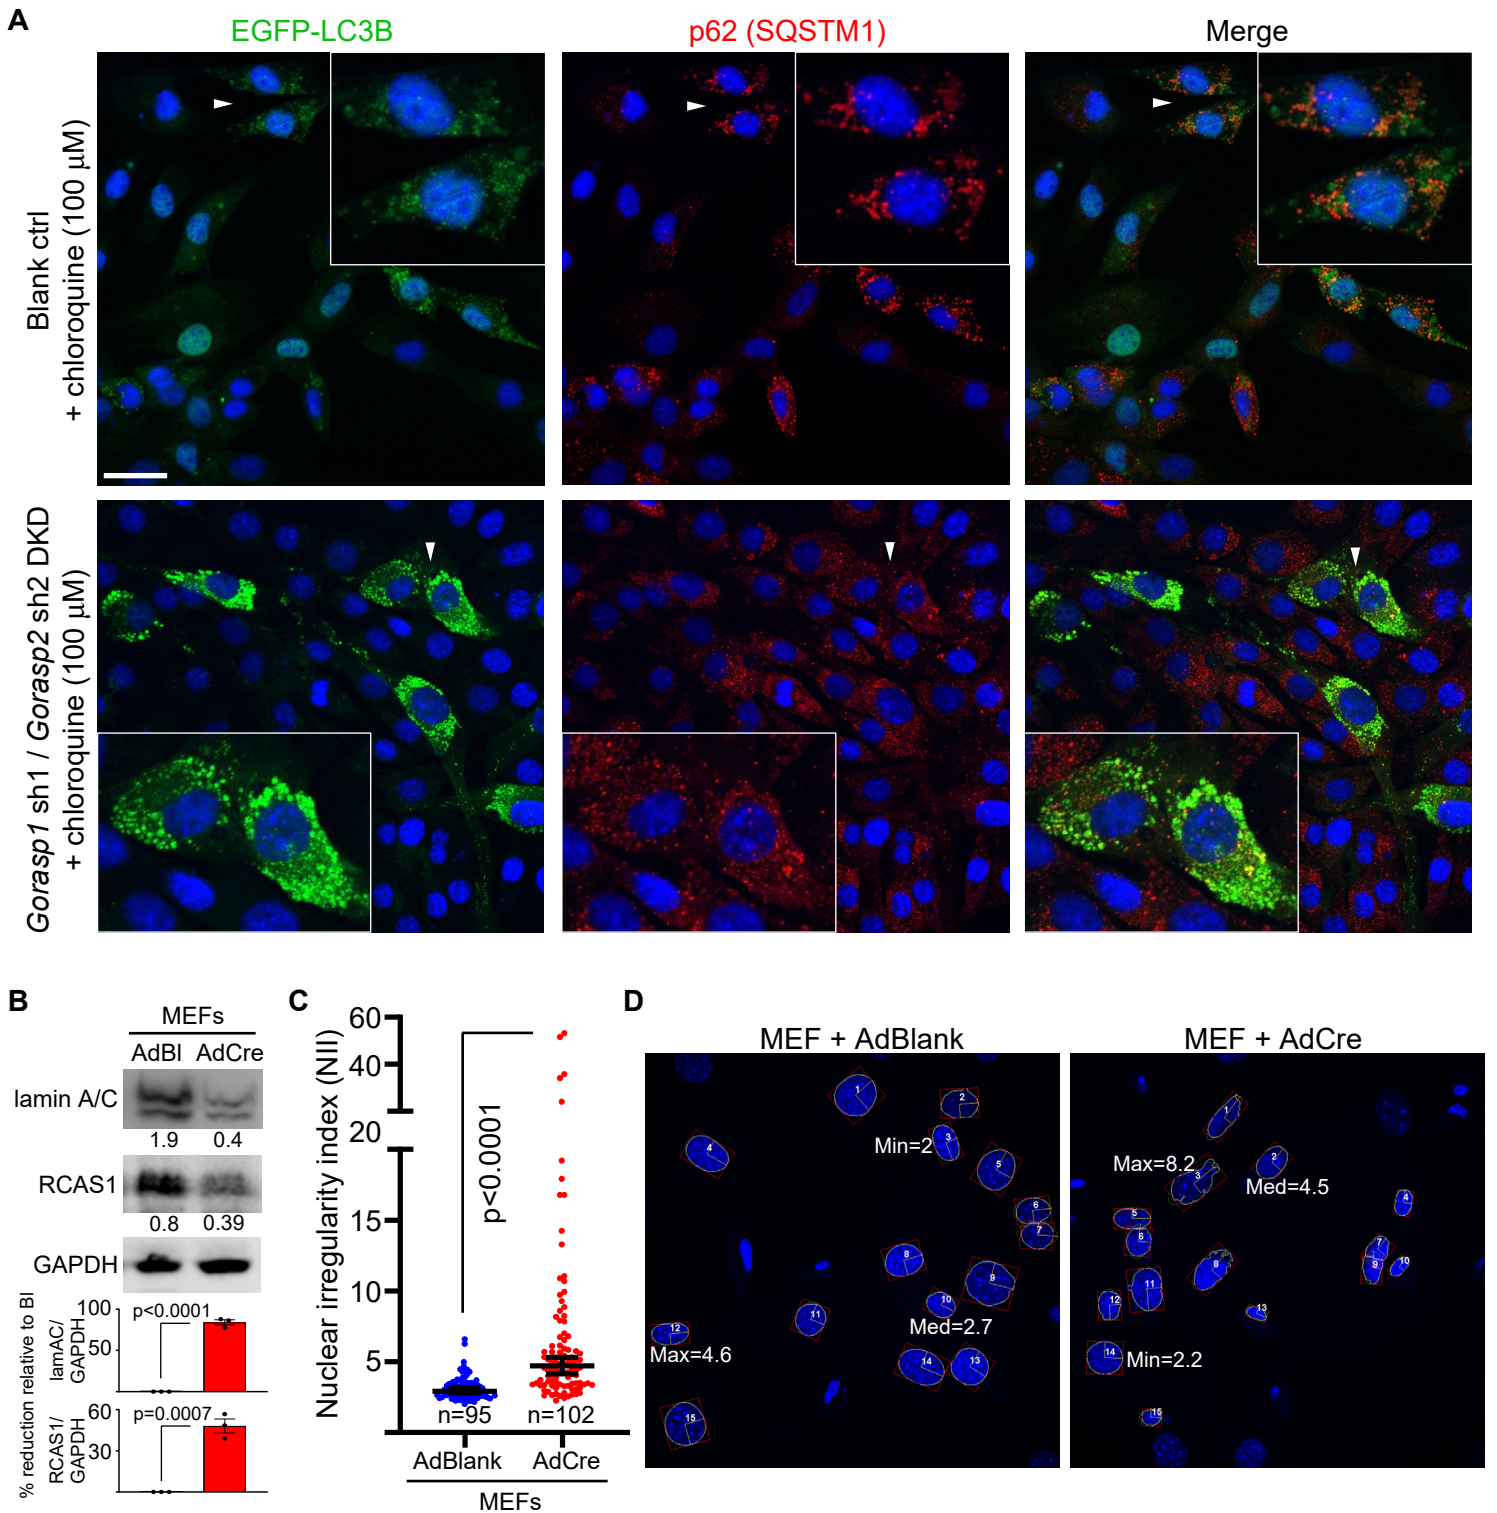

**Supplementary Fig. 12. Autophagy and Golgi disruption in *in vitro* culture models.** (A) A representative immunofluorescence images (from  $n=3$  experiments) on blank control and *Gorasp1/Gorasp2* double KD (DKD) C2C12 cells transduced with retroviruses carrying expression constructs for EGFP-LC3B. After 1 week recovery, the cells were treated with chloroquine for 24 hr after which they were stained for p62. Insets show cells highlighted by white arrowheads with puncta co-localized with LC3B and p62. Scale bar = 20  $\mu\text{m}$ . (B) A representative immunoblot of lamin A/C and RCAS1 on *Lmna*<sup>flx/flx</sup> MEFs 5 days after infection with AdBlank (AdBI) or AdCre from 3 independent experiments. Numbers in line denote quantitation of blots normalized to GAPDH in arbitrary units. % reduction calculated from the quantitation, relative to blank (BI) controls, are shown below. P values were derived using unpaired, 2-tailed student's t-test. Error bars = SEM. (C) Nuclear irregularity index (NII) of nuclei of *Lmna*<sup>flx/flx</sup> MEFs 5 days after infection with AdBlank or AdCre pooled from 3 independent experiments. P value was derived using unpaired, two-tailed student's t test. Error bars = SEM. (D) A representative image of NII plugin for automated nuclear irregularity index as shown for Fig. 6F. Maximum/median/minimum NII for MEFs infected with either AdBlank or AdCre are shown.

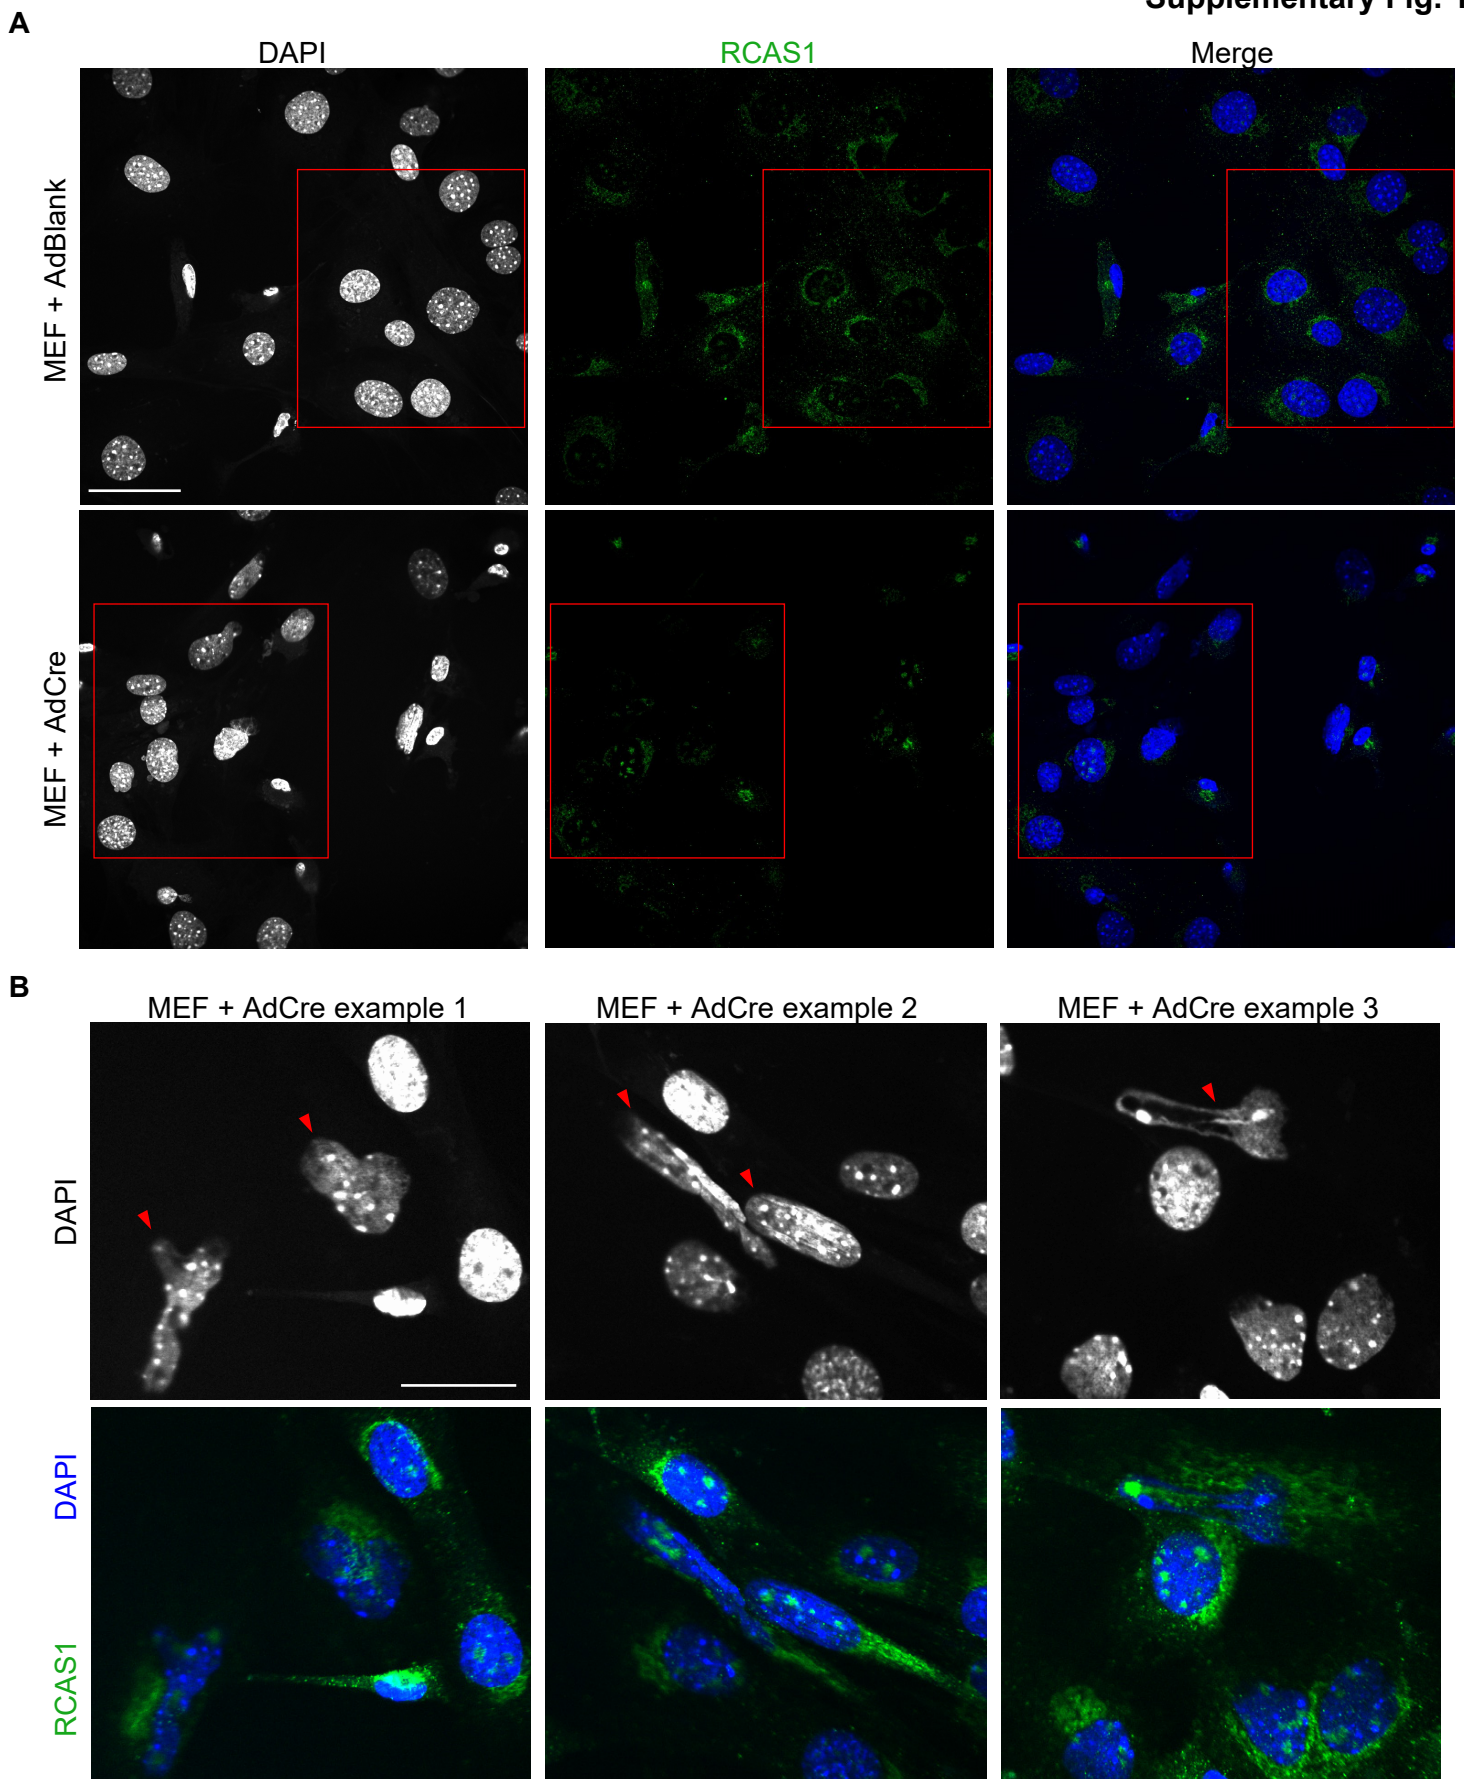

**Supplementary Fig. 13. Golgi disruption in  $Lmna^{flx/flx}$  MEFs with *in vitro*  $Lmna$  deletion. (A)** Uncropped images shown in Fig. 6F. Red boxes denote cropped images in Fig. 6F. **(B)** Additional images of  $Lmna^{flx/flx}$  MEFs transduced with AdCre showing reduced RCAS1 signal and disrupted Golgi, particularly in severely misshapen nuclei (denoted by red arrowheads). The DAPI and RCAS1 signals have been saturated for better viewing. Scale bars = 20  $\mu$ m.

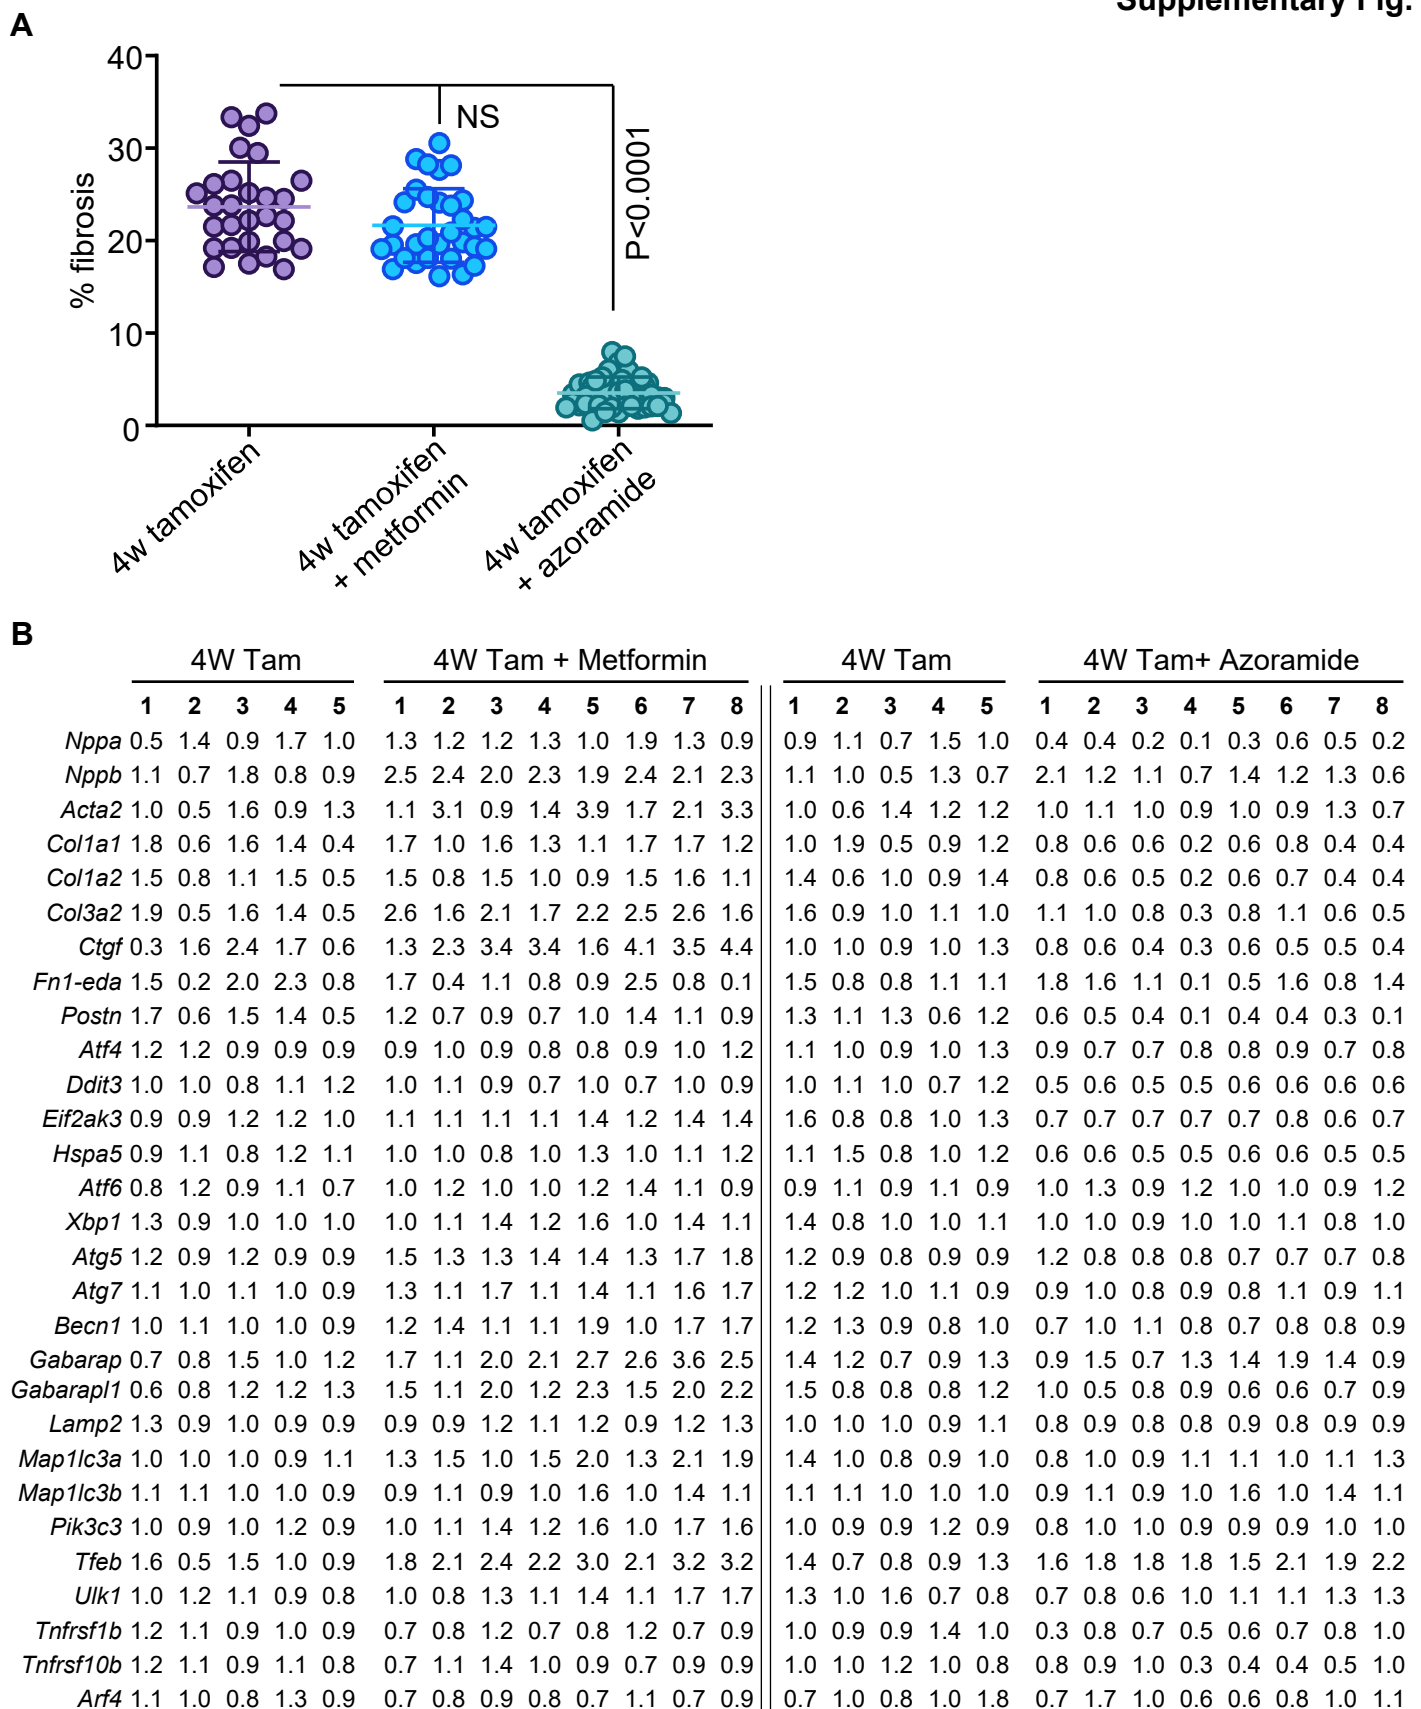

**Supplementary Fig. 14. Characterization of Tam-treated CM-CreTRAP:*Lmna*<sup>flox/flox</sup> mice treated with metformin or azoramide.** (A) Quantitation of % fibrosis based on Masson's trichrome staining of hearts from CM-CreTRAP:*Lmna*<sup>flox/flox</sup> mice at 4 weeks post Tam treatment alone or with either metformin or azoramide. Average % fibrosis was calculated from ~30 independent images from 3 mouse hearts per group. Error bars = standard deviation. NS = not significant. (B) mRNA fold change values obtained from qPCR analyses to generate the heatmap shown in fig. 7d. Numbers on top denote individual heart samples. Average  $\Delta$ Ct values from 4W Tam (n=5) were used as a reference to determine all  $\Delta\Delta$ Ct fold change values.

|                              | Sex | CHF Etiology         | <i>LMNA</i> Mutation                                  | Tissue | Age (Years) |
|------------------------------|-----|----------------------|-------------------------------------------------------|--------|-------------|
| <i>LMNA</i> <sup>+/+</sup> 1 | M   | NF                   | None                                                  | LV     | 52          |
| <i>LMNA</i> <sup>+/+</sup> 2 | M   | NF                   | None                                                  | LV     | 33          |
| <i>LMNA</i> <sup>+/+</sup> 3 | M   | NF                   | None                                                  | LV     | 54          |
| <i>LMNA</i> <sup>+/+</sup> 4 | F   | NF                   | None                                                  | LV     | 23          |
| <i>LMNA</i> <sup>mut</sup> 1 | M   | Ischemic <i>LMNA</i> | p Thr10Ile (T101)**                                   | LV     | 47          |
| <i>LMNA</i> <sup>mut</sup> 2 | M   | Familial/Laminopathy | Inferred from family history/declined genetic testing | LV     | 49          |
| <i>LMNA</i> <sup>mut</sup> 3 | M   | <i>LMNA</i> NICM     | p.Leu320Phefs*160                                     | LV     | 45          |
| <i>LMNA</i> <sup>mut</sup> 4 | F   | <i>LMNA</i> NICM     | p Thr10Ile (T101)                                     | LV     | 33          |

**Supplementary Table 1. Heart tissue samples from human subjects.** LV = left ventricle, NF = non failing, NICM = non-ischemic cardiomyopathy. \*\* Father of patient *LMNA*<sup>mut</sup> 4



| Groups                                                          | Sex(n)                  | FS (%)    | EF (%)    | LVESD(mm)  | LVEDD(mm)  | LVESPW(mm) | LVEDPW(mm) |
|-----------------------------------------------------------------|-------------------------|-----------|-----------|------------|------------|------------|------------|
| CreTRAP: <i>Lmna</i> <sup>flox/flox</sup><br>+ corn oil (Veh)   | M (7)<br>-----<br>F (5) | 28.2±1.24 | 55.5±1.47 | 2.99±0.083 | 4.16±0.058 | 1.13±0.039 | 0.82±0.02  |
| CreTRAP: <i>Lmna</i> <sup>flox/flox</sup><br>+ 2 weeks post Tam | M (6)<br>-----<br>F (6) | 24.7±1.13 | 48.3±1.81 | 3.22±0.085 | 4.27±0.076 | 1.12±0.063 | 0.84±0.046 |
| CreTRAP: <i>Lmna</i> <sup>flox/flox</sup><br>+ 2 weeks Tam+Met  | M (3)<br>-----<br>F (5) | 25.9±2.62 | 50.8±4.15 | 2.93±0.156 | 3.93±0.97  | 1.1±0.065  | 0.77±0.05  |
| CreTRAP: <i>Lmna</i> <sup>flox/flox</sup><br>+ 2 weeks Tam+Azor | M (6)<br>-----<br>F (2) | 28.3±2.09 | 54.9±3.23 | 2.79±0.144 | 3.89±0.132 | 1.07±0.05  | 0.71±0.038 |
| CreTRAP: <i>Lmna</i> <sup>flox/flox</sup><br>+ 4 weeks post Tam | M (6)<br>-----<br>F (6) | 9.02±1.43 | 19.6±2.99 | 4.29±0.153 | 4.7±0.114  | 0.893±0.05 | 0.85±0.053 |
| CreTRAP: <i>Lmna</i> <sup>flox/flox</sup><br>+ 4 weeks Tam+Met  | M (3)<br>-----<br>F (5) | 19.3±1.91 | 39.7±3.44 | 3.43±0.201 | 4.23±0.165 | 1.1±0.07   | 0.86±0.059 |
| CreTRAP: <i>Lmna</i> <sup>flox/flox</sup><br>+ 4 weeks Tam+Azor | M (6)<br>-----<br>F (2) | 24.7±2.8  | 48.8±4.74 | 2.91±0.149 | 3.84±0.084 | 1.08±0.048 | 0.79±0.044 |

**Supplementary Table 2. Echocardiography table for Fig. 7B.** FS = fractional shortening, EF = ejection fraction, LVESD = left ventricular end systolic dimension, LVEDD = left ventricular end diastolic dimension, LVESPW = left ventricular end systolic posterior wall thickness, LVEDPW = left ventricular end diastolic posterior wall thickness.

Supplementary Table 3

| <b>Primers</b>         | <b>Forward (5' - 3')</b>           | <b>Reverse (5' - 3')</b>        |
|------------------------|------------------------------------|---------------------------------|
| <b>CreERT2</b>         | CGT ACT GAC GGT GGG AGA AT         | CCC GGC AAA ACA GGT AGT TA      |
| <b>Nppa</b>            | TCG TCT TGG CCT TTT GGC T          | TCC AGG TGG TCT AGC AGG TTC T   |
| <b>Nppb</b>            | AAG TCC TAG CCA GTC TCC AGA        | GAG CTG TCT CTG GGC CAT TTC     |
| <b>Ccn2 (CTGF)</b>     | GTG CCA GAA CGC ACA CTG            | CCC CGG TTA CAC TCC AAA         |
| <b>Postn</b>           | ATG TCA TTG ACC GTG TCC TG         | AAG AGC GTG AAG TGA CCA TC      |
| <b>Col1a1</b>          | TTC TCC TGG CAA AGA CGG ACT CAA    | AGG AAG CTG AAG TCA TAA CCG CCA |
| <b>Col1a2</b>          | GGC CCC CTG GTA TGA CTG GCT        | CGC CAC GGG GAC CAC GAA TC      |
| <b>Col3a1</b>          | GTT CTA GAG GATGGCTGTACTAAACACA    | TTG CCT TGC GTG TTT GAT ATT C   |
| <b>Fn1 EDA</b>         | CAG AAA TGA CCA TTG AAG GT         | ATG AGT CCT GAC ACA ATC AC      |
| <b>Eif2ak3 (PERK)</b>  | TCC CTG CTC GAA TCT TCC TA         | CAT CCC AAG GCA GAA CAG AT      |
| <b>Atf4</b>            | ATG GGT TCT CCA GCG ACA            | TCC ATT TTC TCC AAC ATC CAA     |
| <b>Ddit3 (CHOP)</b>    | CTG GAA GCC TGG TAT GAG GA         | CCT CTG TCA GCC AAG CTA GG      |
| <b>Hspa5 (BiP)</b>     | CTT GGG GAC CAC CTA TTC CT         | GGT TGG ACG TGA GTT GGT TC      |
| <b>Atf6</b>            | GCA GCA GTC GAT TAT CAG CA         | GTT AGG TAG CTG TGC GGC TC      |
| <b>Xbp1 total</b>      | TAT CCT TTT GGG CAT TCT GG         | ACA GAG AAA GGG AGG CTG GT      |
| <b>Xbp1 spliced</b>    | GAA CCA GGA GTT AAG AAC ACG        | AGG CAA CAG TGT CAG AGT CC      |
| <b>Tnnt2</b>           | TAC AGA CTC TGA TCG AGG CTC ACT TC | TCA TTG CGA ATA CGC TGC TGC TC  |
| <b>Tnni3</b>           | TAA GAT CTC CGC CTC CAG AA         | CGG CAT AAG TCC TGA AGC TC      |
| <b>Tnnc1</b>           | AGG CAG CCT TGA ACT CAT TC         | TGT CCT GTG AGC TGT CTC CA      |
| <b>Myh6</b>            | ACG GTG ACC ATA AAG GAG GA         | TGT CCT CGA TCT TGT CGA AC      |
| <b>Mef2d</b>           | TCA ACC ACT CCA ACA AGC TGT T      | GTA CTC GGT GTA CTT GAG CAG CA  |
| <b>Gata4</b>           | GAG CCT GCC AAG CCA AGC            | CTC CCG TCT ATC ACC TTT GTC C   |
| <b>Pdgfra</b>          | GGG AAG GAC TGG AAG CTT GGG GC     | AGA TGA GGC CCG GCC CTG TGA GG  |
| <b>Ddr2</b>            | TTC CCT GCC CAG CGA GTC CA         | ACC ACT GCA CCC TGA CTC CTC C   |
| <b>Tcf21</b>           | ATG CTG GAC TGT GAC TCC CT         | GAG CGG GCT TTT CTT AGT GG      |
| <b>Cdh5</b>            | TCT TGC CAG CAA ACT CTC CT         | TTG GAA TCA AAT GCA CAT CG      |
| <b>Pecam1</b>          | TCA CCA TCA ACA GCA TCC A          | GGT GCT GAG ACC TGC TTT TC      |
| <b>Vcam1</b>           | CCG GCA TAT ACG AGT GTG AA         | GAT GCG CAG TAG AGT GCA AG      |
| <b>Med25</b>           | GTG GTG GCG AGA GCT GTA GT         | TCT CAA ACA GAA GCC GGA G       |
| <b>Atg5</b>            | ACA GCT GCA CAC ACT TGG AG         | TTC CAG CAT TGG CTC TAT CC      |
| <b>Atg7</b>            | CCA GGA CAC CCT GTG AAC TT         | GCT CTC CCT GGT GTC CAT TA      |
| <b>Becn1</b>           | CAG CTG GAC ACT CAG CTC AA         | CTT GCG GTT CTT TTC CAC AT      |
| <b>Gabarap</b>         | TCC CGG TGA TAG TGG AAA AA         | AAT TCG CTT CCG GAT CAA G       |
| <b>Gabarap11</b>       | GAC CTC ACT GTT GGC CAG TT         | TCT TCC TCG TGG TTG TCC TC      |
| <b>Lamp2</b>           | AGA CCA AAC TCC CAC CAC TG         | TTG GAG TTG GAG TTG GAG TTG     |
| <b>Map1lc3a (LC3B)</b> | GCC TGT CCT GGA TAA GAC CA         | CCG TCT TCA TCC TTC TCC TG      |
| <b>Map1lc3b (LC3A)</b> | CGT CCT GGA CAA GAC CAA GT         | CAG GAA GCC GTC TTC ATC TC      |
| <b>Pik3c3</b>          | CTA ACG TGG AGG CAG ATG GT         | CTG TCC AGC CAA TCC ACT TT      |
| <b>Tfeb</b>            | CTC AGT GGT CTT GGG CAA AT         | TGT AGT CGA GGG GAG ACA GG      |
| <b>Ulk1</b>            | GCT CAC CTA AGC TGC CTG AC         | ATT CTG AGA GCT GGG GGT TT      |
| <b>Arf4</b>            | CTG GCA AGA CGA CAA TTC TGT        | CCA CAA AAA TGA GAC CCT GGG TA  |
| <b>Trappc13</b>        | CAA AGG ATG GCT CCA GGT TA         | CAC GAG GTC CAT CAT CCT CT      |

Supplementary Table 3. PCR primer sequences used in the study (continued on the next page)

Supplementary Table 3 continued

| <b><u>Primers</u></b>     | <b><u>Forward (5' - 3')</u></b> | <b><u>Reverse (5' - 3')</u></b> |
|---------------------------|---------------------------------|---------------------------------|
| <b><i>Tnfrsf1b</i></b>    | ACA CCC TAC AAA CCG GAA CC      | AGC CTT CCT GTC ATA GTA TTC CT  |
| <b><i>Tnfrsf10b</i></b>   | CGG GCA GAT CAC TAC ACC C       | TGT TAC TGG AAC AAA GAC AGC C   |
| <b><i>Gorasp1</i></b>     | AGT CTG GGG TGT GGT ATT GG      | TTG TGA GGT CGT AGC TGG AG      |
| <b><i>Gorasp2</i></b>     | GGG TTT ACA GAG GTC CAG CT      | TGC CGA GCT AAT GGA GAG TC      |
| <b><i>Sqstm1</i></b>      | AGA ATG TGG GGG AGA GTG TG      | TTT CTG GGG TAG TGG GTG TC      |
| <b><i>Mbtps1</i></b>      | CTG GTG GTT TTG CTC TGT GG      | GGC TGT GAA GTA TCC GTT GAA AG  |
| <b><i>Gapdh</i></b>       | TGC ACC ACC AAC TGC TTA G       | GGA TGC AGG GAT GAT GTT C       |
| <b>Genotyping primers</b> | CTA CGG TGT AAA AGA GGC AGG     | CTT GCG AAC CTC ATC ACT CGT     |

Supplementary Table 3. PCR primer sequences used in the study.

Supplementary Table 4

| <u>Antibodies</u>             | <u>Company</u>                                             | <u>Catalogue #</u>                               | <u>Concentration</u><br>IB = immunoblot<br>IF = immunofluorescence |
|-------------------------------|------------------------------------------------------------|--------------------------------------------------|--------------------------------------------------------------------|
| $\alpha$ -smooth muscle actin | Abcam                                                      | ab5694                                           | IB(1:2000), IF(1:300)                                              |
| $\alpha$ -tubulin             | Santa Cruz Biotechnology                                   | sc-5286                                          | IB(1:2000)                                                         |
| ATF4                          | Cell Signaling Technology                                  | 11815                                            | IB(1:1000)                                                         |
| $\beta$ -actin                | Cell Signaling Technology                                  | 3700                                             | IB(1:4000)                                                         |
| Cre Recombinase               | Cell Signaling Technology                                  | 12830                                            | IB(1:200)                                                          |
| Desmin                        | Santa Cruz Biotechnology                                   | sc-23879                                         | IF(1:200)                                                          |
| GAPDH                         | Millipore Sigma                                            | MAB374                                           | IB(1:5000)                                                         |
| GFP                           | Abcam                                                      | ab6556                                           | IB(1:500), IF(1:300)                                               |
| GFP (TRAP)                    | Bi-Institutional Antibody and<br>Bioresource Core Facility | HtzGFP_02 (clone 19C8)<br>HtzGFP_04 (clone 19F7) | 50ug each per sample                                               |
| Lamin A/C                     | Santa Cruz Biotechnology                                   | sc-376248                                        | IB(1:2000), IF(1:300)                                              |
| Lamin B1                      | Santa Cruz Biotechnology                                   | sc-30264                                         | IB(1:500)                                                          |
| LC3B                          | Cell Signaling Technology                                  | 2775                                             | IB(1:1000)                                                         |
| MED6                          | Santa Cruz Biotechnology                                   | sc-390474                                        | IB(1:500)                                                          |
| MED25                         | Santa Cruz Biotechnology                                   | Sc-393759                                        | IB(1:500)                                                          |
| p62                           | Cell Signaling Technology                                  | 23214                                            | IB(1:1000)                                                         |
| PDGFR $\alpha$                | RnD Systems                                                | AF1062                                           | IF(1:100)                                                          |
| PERK                          | Cell Signaling Technology                                  | 3192                                             | IB(1:500)                                                          |
| phospho-eIF2 $\alpha$         | Cell Signaling Technology                                  | 3398                                             | IB(1:500)                                                          |
| eIF2 $\alpha$                 | Cell Signaling Technology                                  | 5324                                             | IB(1:1000)                                                         |
| CHOP                          | Cell Signaling Technology                                  | 2895                                             | IB(1:500)                                                          |
| sarcomeric actin              | Invitrogen                                                 | MA1-21597                                        | IF(1:20)                                                           |
| Troponin T                    | Invitrogen                                                 | MA5-12960                                        | IB(1:2000), IF(1:200)                                              |
| Vimentin                      | Cell Signaling Technology                                  | 5741                                             | IF(1:300)                                                          |
| CREB3                         | Proteintech                                                | 11275-1-AP                                       | IB(1:1000), IF(1:200)                                              |
| RCAS1                         | Proteintech                                                | 66170-1-Ig                                       | IF(1:200)                                                          |
| GOLPH3                        | Proteintech                                                | 19112-1-AP                                       | IB(1:1000)                                                         |
| Donkey anti-goat 594          | Invitrogen                                                 | A-11058                                          | IF(1:400)                                                          |
| Goat anti-mouse 594           | Invitrogen                                                 | A-21044                                          | IF(1:400)                                                          |
| Goat anti-rabbit 488          | Invitrogen                                                 | A-11034                                          | IF(1:400)                                                          |
| Goat anti-rabbit 594          | Invitrogen                                                 | R-37117                                          | IF(1:8)                                                            |
| Licor green mouse             | LI-COR Biosciences                                         | 926-32210                                        | IB(1:5000)                                                         |
| Licor green rabbit            | LI-COR Biosciences                                         | 926-32211                                        | IB(1:5000)                                                         |
| Licor red mouse               | LI-COR Biosciences                                         | 926-68070                                        | IB(1:5000)                                                         |
| Licor red rabbit              | LI-COR Biosciences                                         | 926-68071                                        | IB(1:5000)                                                         |

Supplementary Table 4. Antibodies and their dilutions used in the study.
